1 **Cell lineage specification during development of the anterior lateral plate mesoderm**  
2 **and forelimb field**

3

4 Axel H Newton <sup>1,2\*</sup>, Sarah M Williams <sup>3,4</sup>, Andrew T Major <sup>1</sup>, Craig A Smith <sup>1</sup>

5

6 1. Biomedicine Discovery Institute, Monash University, Victoria, Australia

7 2. School of BioSciences, The University of Melbourne, Victoria, Australia

8 3. Monash Bioinformatics Platform, Monash University, Victoria, Australia

9 4. QCIF, University of Queensland, Queensland, Australia

10

11 \* Corresponding author: [axel.newton@unimelb.edu.au](mailto:axel.newton@unimelb.edu.au)

12

13 ORCiDs: [0000-0001-7175-5978](https://orcid.org/0000-0001-7175-5978) (A. H. Newton); [0000-0002-0944-0622](https://orcid.org/0000-0002-0944-0622) (S. M. Williams);

14 [0000-0001-9036-6652](https://orcid.org/0000-0001-9036-6652) (A. T. Major); [0000-0002-1670-5545](https://orcid.org/0000-0002-1670-5545) (C. A Smith).

15 **Abstract**

16 The lateral plate mesoderm (LPM) is a transient embryonic tissue that gives rise to a diverse  
17 range of mature cell types, including the cardiovascular system, the urogenital system,  
18 endoskeleton of the limbs, and mesenchyme of the gut. While the genetic processes that drive  
19 development of these tissues are well defined, the early cell fate choices underlying LPM  
20 development and specification are poorly understood. In this study, we utilize single-cell  
21 transcriptomics to define cell lineage specification during development of the anterior LPM  
22 and the forelimb field in the chicken embryo. We identify the molecular pathways directing  
23 differentiation of the aLPM towards a somatic or splanchnic cell fate, and subsequent  
24 emergence of the forelimb mesenchyme. We establish the first transcriptional atlas of  
25 progenitor, transitional and mature cell types throughout the early forelimb field and uncover  
26 the global signalling pathways which are active during LPM differentiation and forelimb  
27 initiation. Specification of the somatic and splanchnic LPM from undifferentiated mesoderm  
28 utilizes distinct signalling pathways and involves shared repression of early mesodermal  
29 markers, followed by activation of lineage-specific gene modules. We identify rapid  
30 activation of the transcription factor *TWIST1* in the somatic LPM preceding activation of  
31 known limb initiation genes, such as *TBX5*, which plays a likely role in epithelial-to-  
32 mesenchyme transition of the limb bud mesenchyme. Furthermore, development of the  
33 somatic LPM and limb is dependent on ectodermal BMP signalling, where BMP antagonism  
34 reduces expression of key somatic LPM and limb genes to inhibit formation of the limb bud  
35 mesenchyme. Together, these findings provide new insights into molecular mechanisms that  
36 drive fate cell choices during specification of the aLPM and forelimb initiation.

## 37 **Introduction**

38 The lateral plate mesoderm (LPM) is a transient, embryonic tissue in vertebrate embryos  
39 which produces a remarkable diversity of cell and organ types including the cardiovascular  
40 system, urogenital system, smooth muscle and connective tissues of the limb (Nishimoto and  
41 Logan, 2016; Prummel et al., 2019, 2020). The LPM arises in the vertebrate embryo from the  
42 mesodermal germ layer as bilateral sheets along the anterior–posterior (A–P) axis, forming  
43 anterior (aLPM) and posterior (pLPM) domains (Tanaka, 2016). Diversification of the  
44 primitive mesoderm into lateral plate, paraxial (somite) or axial (notochord) mesoderm  
45 occurs in response to differential combinations of BMP, FGF or WNT signals (Tonegawa et  
46 al., 1997; Loh et al., 2016). Specifically, LPM formation is achieved through localized BMP4  
47 signalling and antagonism of WNT signals, while paraxial mesoderm forms through WNT  
48 signals and BMP antagonism via NOGGIN (Tonegawa et al., 1997; Tonegawa and  
49 Takahashi, 1998; Yoshino et al., 2016). The primitive LPM undergoes further dorsoventral  
50 subdivision into two distinct layers separated by the embryonic coelom: the somatic LPM,  
51 which fuses with the ectoderm to form the somatopleure, and splanchnic LPM which fuses  
52 with the endoderm to form the splanchnopleure (Funayama et al., 1999). The somatic LPM  
53 gives rise to the body wall, cardiovascular system, smooth muscle, amnion and limbs, while  
54 the splanchnic LPM generates mesenteries and connective tissue lining the gut and  
55 respiratory systems (Prummel et al., 2020).

56 Specification of the LPM progenitors towards its diverse tissue fates are well defined and  
57 achieved through activation of key transcriptional regulators. For example, activation of the  
58 transcription factors *NKX2-5*, *TBX5* or *FOXF1*, in cardiac, somatic or splanchnic LPM cells  
59 initiate development of the heart, forelimb or gut, respectively (Mahlapuu et al., 2001;  
60 Harvey et al., 2002; Agarwal et al., 2003). However, the mechanisms that drive LPM  
61 formation and subdivision are not well defined (Prummel et al., 2019, 2020). Initial LPM  
62 specification from the primitive mesoderm is accompanied by activation of transcription  
63 factors *FOXF1*, *HAND1*, *OSR1* and *PRRX1* (Kuratani et al., 1994; Peterson et al., 1997; Loh  
64 et al., 2016). During LPM development and differentiation, *OSR1* becomes restricted to the  
65 coelomic epithelium / intermediate mesoderm, *PRRX1* and activation of *IRX3* to the somatic  
66 LPM, and *HAND1* and *FOXF1* to the splanchnic LPM (Funayama et al., 1999; Mahlapuu et  
67 al., 2001). Intriguingly however, *Prrx1*<sup>-/-</sup>, *Irx3*<sup>-/-</sup> and *Osr1*<sup>-/-</sup> mouse mutants do not possess  
68 an aberrant LPM phenotype, though display later defects in the limbs (Martin et al., 1995;  
69 Wang et al., 2005; Li et al., 2014). Conversely, *Hand1*<sup>-/-</sup> mutants are embryonic lethal with

70 broad developmental defects (Firulli et al., 1998) and *Foxf1*<sup>-/-</sup> mutants show partial to  
71 incomplete subdivision of the LPM, expression of somatic LPM genes in the splanchnic  
72 LPM, and gut defects, suggesting a failure of splanchnic LPM commitment (Mahlapuu et al.,  
73 2001). Thus, while *FOXF1* and *HAND1* play important roles in splanchnic LPM  
74 development, those that promote somatic LPM differentiation remain unclear.

75 LPM subdivision and somatic LPM identity is suggested to occur through secreted BMPs  
76 from the overlying ectoderm (Funayama et al., 1999; Mahlapuu et al., 2001). In the chicken  
77 embryo, BMP2 is sufficient to activate *PRRX1* expression in the LPM, while BMP  
78 antagonism by *NOGGIN* represses activation of *PRRX1* and *IRX3* (Funayama et al., 1999;  
79 Ocaña et al., 2012). The ectodermal origin of these signals are observed where *ex vivo* culture  
80 of LPM with ectoderm initiates *PRRX1* and *IRX3* expression, but not when LPM is cultured  
81 alone (Funayama et al., 1999). Together, these observations suggest that ectodermal BMP  
82 signals activate somatic LPM genes, restrict splanchnic LPM genes and drive subdivision of  
83 the LPM. However, this hypothesis has not been directly tested. Furthermore, the specific  
84 ligands, receptors and gene expression dynamics underlying this subdivision are yet to be  
85 defined.

86 After LPM subdivision, forelimb development is initiated in the somatopleure through  
87 activation of the T-box transcription factor *TBX5* (Logan et al., 1998; Agarwal et al., 2003;  
88 Rallis et al., 2003). This field is defined by nested *Hox* gene expression and RA signalling  
89 (Nishimoto et al., 2015; Tanaka, 2016). Limb outgrowth begins with a localized epithelial to  
90 mesenchymal transition (EMT) of the somatic LPM, which has been proposed to be a *TBX5*  
91 and *FGF10* dependant process (Gros and Tabin, 2014). *TBX5* induces the activation of  
92 *FGF10*, which establishes a positive feedback loop with *FGF8* in the ectoderm to drive  
93 outgrowth of the limb bud mesenchyme (Ohuchi et al., 1997; Moon and Capecchi, 2000;  
94 Nishimoto et al., 2015). This activates a network of patterning factors and morphogens to  
95 further promote outgrowth maintenance and patterning (for comprehensive reviews see  
96 Tickle, 2015; Zuniga, 2015). However, the events immediately preceding the *TBX5*-  
97 dependant limb regulatory pathway in the somatic LPM are less well understood.

98 Single-cell transcriptomics have provided high-resolution analyses of cell lineage trajectories  
99 underlying multiple aspects of mesoderm and limb development (Loh et al., 2016; Scialdone  
100 et al., 2016; Gerber et al., 2018; Feregrino et al., 2019; Pijuan-Sala et al., 2019; Han et al.,  
101 2020; Johnson et al., 2020; Mahadevaiah et al., 2020). Importantly however, details regarding

102 the cellular decisions that underlie LPM differentiation, subdivision, and commitment to a  
103 limb fate remain undetermined. In this study, we resolve the early cell fate decisions  
104 underlying differentiation of the aLPM in the developing chicken forelimb field using single  
105 cell RNA sequencing. We define the signalling pathways and ligand-receptor pairs which  
106 communicate between the germ layers and their tissue derivatives, reconstruct lineages and  
107 gene expression dynamics during LPM development, and identify likely candidates  
108 underlying EMT and initiation of the forelimb mesenchyme. Our data corroborate known  
109 interactions within the mesoderm, but also reveal novel tissue-specific markers and gene  
110 networks activated during specification of the LPM into somatic and splanchnic tissues.  
111 Notably, we identify *TWIST1* as an early marker of somatic LPM development with a likely  
112 role underlying EMT of the limb bud mesenchyme. Finally, we highlight the importance of  
113 BMP signalling underlying development of the LPM and limb bud mesenchyme. Together,  
114 these findings provide a robust overview of the developmental landscape underlying  
115 formation and specification of the aLPM.

## 116 **Results**

### 117 **Transcriptional clustering of cell populations in the presumptive chicken forelimb field**

118 To study cell fate decisions underlying development of the chicken aLPM and forelimb, we  
119 performed single-cell RNA sequencing of cell populations and generated cell-type specific  
120 clusters. Briefly, tissues corresponding to the presumptive chicken forelimb field, lateral to  
121 somites 20-25, were dissected from embryonic day (E) 1.5, 2.5 and 3.5 chicken embryos,  
122 corresponding to approximate Hamburger-Hamilton stage (HH) 10, 14 and 18, respectively  
123 (Hamburger and Hamilton, 1951) (Figure 1a). These stages cover initial development of the  
124 aLPM, subdivision of the LPM into the somatic and splanchnic layers, and limb initiation and  
125 early outgrowth (Newton and Smith, 2020). Dissected tissues were dissociated to single cells,  
126 FACS sorted to remove dead and dying cells, then processed through the 10x Chromium  
127 system. After quality filtering, a total of 15355 cells, corresponding to 5273 cells from E1.5,  
128 6856 from E2.5 and 3226 from E3.5 embryos, were sequenced across 16779 genes. To  
129 remove low read count or low diversity cells, we applied an additional strict filtering  
130 threshold of 2000 UMI counts per cell, yielding a total of 3262 cells, with 1210 from E1.5,  
131 1313 from E2.5 and 739 from E3.5 embryos. Cell transcriptomic relationships were  
132 visualized with global t-distributed Stochastic Neighbour Embedding (tSNE) dimension  
133 reduction, which showed a distinct separation of cell types according to cell cycle phase and  
134 embryonic stage (Figure 1b, c).

135 Unsupervised clustering of the chicken E1.5, E2.5 and E3.5 presumptive forelimb cell  
136 populations revealed 13 transcriptionally distinct cell clusters (c) which represented  
137 embryonic vasculature and tissues derived from the ectoderm, mesoderm, and endoderm  
138 germ layers, covering all major cell types within the presumptive forelimb field (Figure 1c-  
139 d). Tissue and cell type identities were assigned to each cluster based on their differential  
140 gene expression profiles (observed as differences in log-fold change between clusters; Figure  
141 1e-f) and corresponding spatiotemporal expression patterns observed throughout the  
142 developing chicken embryo on the GEISHA chicken gene expression database (Bell et al.,  
143 2004; Darnell et al., 2007). Cluster-specific gene expression is shown in Figure 1e-f and  
144 Table S1. The embryonic ectoderm comprised two clusters (c2 and c11) defined by  
145 expression of *FABP3* and *WNT6*. However, c11 showed unique expression of *FGF8*  
146 revealing these cells as progenitors that contribute to formation of the Apical Ectodermal  
147 Ridge (AER). The embryonic endoderm (c7) was defined by unique expression of *GUCA2B*

148 and *TTR*, as well as *SHH* (not observed in limb bud mesenchyme due to the early stages  
149 sampled). Embryonic vasculature (c8) showed unique expression of *CDH5*, and red blood  
150 cells (c13) expressed haemoglobin subunit *HBBA*.

151 The embryonic mesoderm was found to contribute the largest overall number of cells and was  
152 defined by robust expression of *PRRX1*. The mesoderm was comprised of six clusters (c1, c3,  
153 c4, c5, c10 and c12) which represented known mesodermal tissue-types during development,  
154 which were separated by embryonic stage (Figure 1b, c). Namely, the primitive mesoderm /  
155 LPM (c4) was comprised of E1.5 cells and displayed strong expression of early markers such  
156 as *MSGN1*, *EVX1* and *CDX4*. Cells of the E2.5 mesoderm were comprised of clusters  
157 representing the somatic LPM (c3) which displayed high *PRRX1* and low *TBX5* expression,  
158 splanchnic LPM (c5) with *COLEC10* expression, and the paraxial mesoderm (c1) which  
159 displayed unique expression of *TCF15* (Figure 1d, e). Finally, E3.5 cell clusters represented  
160 more differentiated tissues, such as the extraembryonic LPM / amnion (c12) through  
161 expression of *AQP1*, and limb bud mesenchyme (c10) through high *TBX5* and *FGF10*. We  
162 also detected two clusters (c6 and c9) which possessed ubiquitous expression of ectodermal  
163 and mesodermal markers, but also high ribosomal and mitochondrial counts, so defined these  
164 cells as low diversity cells and were excluded from subsequent analyses.

165

### 166 **Global receptor ligand signalling throughout the differentiating mesoderm**

167 Specification of the mesoderm during embryogenesis is influenced by dynamic intrinsic and  
168 extrinsic signalling between the surrounding germ layers and developing tissues. Particularly,  
169 members of the BMP, FGF, HH and WNT signalling pathways are known to influence  
170 communication between the germ layers (Loh et al., 2016), though the precise ligands and  
171 receptors that facilitate different aspects of mesoderm development are unclear. We therefore  
172 examined global signalling patterns and ligand-receptor crosstalk between the global cell  
173 types during specification of the forelimb field from the aLPM using CellChat (Jin et al.,  
174 2021). This analysis revealed extensive signalling pathway usage between different cell types  
175 and tissues (Figure 2a), which was altered during developmental progression of key tissue  
176 types. The E1.5 primitive MES / LPM (c4) showed the highest level of signalling pathway  
177 activity among the tissues studied, with active signalling through more than half of the  
178 predicted pathways. This included signalling through the important non-canonical WNT,  
179 FGF, HH and BMP pathways, as well as Midkine (MK) and pleiotrophin (PTN), EphrinB,

180 Semaphorin (SEMA3,6), chemokine ligand (CXCL) and adhesion factors laminin, JAM and  
181 NECTIN. However, pathway usage was observed to significantly change during subdivision  
182 of the aLPM into somatic and splanchnic LPM by E2.5, including decreases in ncWNT, FGF,  
183 CXCL and Semaphorin signalling. Splanchnic LPM (c5) formation featured decreased BMP  
184 and enhanced AGRN, FN1, CD99 and Ephrin signalling pathways. In contrast, formation of  
185 the somatic LPM (c3) was characterised by activated collagen, maintained BMP and  
186 NECTIN signalling, and decreased HH signalling. Finally, development of the limb bud  
187 mesenchyme (c10) by E3.5 saw activation of WNT and FGF signalling, confirming known  
188 interactions, as well as strong activation of Ephrin A and ANGPTL. These observations  
189 indicate that development of the LPM is highly dynamic, involving diverse signalling  
190 crosstalk during specification and subsequent differentiation (Figure 2a).

191 LPM development and subdivision are thought to be driven by extrinsic ectoderm and  
192 endoderm signalling (Roberts et al., 1995; Funayama et al., 1999). We therefore interrogated  
193 the datasets to identify the sender and receiver cell-types enriched for TGF- $\beta$ , WNT, BMP,  
194 FGF and HH signalling pathways. This allowed the construction of early signalling networks  
195 (Figure 2b). TGF- $\beta$  did not appear to play a role during LPM differentiation, only received by  
196 the embryonic vasculature. The ectoderm was identified as a subtle sender of BMP signals,  
197 predicted to be received by the early LPM (c4) and somatic LPM / limb bud (c10), and strong  
198 sender of WNT signals which were predicted to be received by the E3.5 limb bud  
199 mesenchyme (c10) and amnion (c12). The somatic LPM was also predicted as a strong  
200 sender and subtle receiver of BMP signals, though whether this signalling is via an autocrine  
201 or paracrine signalling response is unknown. The early mesoderm / LPM was identified as a  
202 strong sender and receiver of FGF signals, suggesting intrinsic signalling. The limb bud  
203 mesenchyme was additionally identified as a sender of FGF signalling, predicted to be  
204 received by the AER ectoderm, confirming the known role of secreted FGF signalling during  
205 limb development (Ohuchi et al., 1997). Importantly, the AER ectoderm (c11) was not  
206 identified as a sender of FGF signals, despite its important role in establishing the FGF10-  
207 FGF8 feedback loop. We predict that this is an artefact of early sampling prior to its  
208 activation, as we did not observe enriched *FGF8* expression in the AER cluster (Table S1).  
209 Finally, the endoderm was identified as a significant sender of HH signalling, predicted to be  
210 received by early LPM, splanchnic LPM and paraxial mesoderm, reaffirming known  
211 interactions during splanchnic LPM development and gut formation (Roberts et al., 1995).



212 With key signalling pathway events established between sender and receiver populations  
213 during LPM differentiation and limb development, we next examined which BMP, FGF, HH  
214 and WNT ligand and receptor pairs were facilitating these dynamic events (Figure 2b).  
215 CellChat (Jin et al., 2021) was further utilized to predict the ligand-receptor crosstalk for each  
216 sender-receiver pair of interest, revealing disparate patterns of ligand and receptor usage  
217 amongst the different cell populations. *FGF8* was significantly enriched during primitive  
218 LPM differentiation, through activation of *FGFR1-4*. During LPM subdivision, endoderm-  
219 mesoderm HH signalling occurred exclusively through *SHH* activation of *PTCH1*, with  
220 potential contributions by *GDF6* and *BMPR-ACVR* receptors in the primitive mesoderm.  
221 Ectoderm-mesoderm BMP signalling was seen to be achieved through secretion of *BMP7*  
222 with activation of combinations of *ACVR1* and *BMPR2*, *ACVR2A* or *ACVR2B* receptor  
223 heterodimers. Interestingly, *BMP2* and *BMPRIA* interactions appeared to be only active in  
224 the early mesoderm, despite suggested to play a role in LPM subdivision (Funayama et al.,  
225 1999). Interestingly, while our data confirm an active role of *BMP4* in early LPM  
226 differentiation (Tonegawa et al., 1997) we also observe a significant, yet undefined role of  
227 localized *BMP5* signalling during LPM specification, subdivision, and development of the  
228 limb bud mesenchyme. Conversely, we see broad expression of WNT ligands in tissues  
229 throughout the limb field, including ectodermal *WNT3A*, *4*, *6*, *7A*, *10A*, but restricted  
230 expression of *FRZD* and *LRP6* receptors only within limb bud mesenchyme and amnion  
231 (extraembryonic LPM). Together, these data reveal that signalling throughout the limb field  
232 is achieved through combinations of both ubiquitous and tissue-specific ligand-receptor  
233 expression patterns (summarized in Figure 2d). Molecular signalling during limb  
234 development appears to be largely driven through ectodermal BMP and WNTs, and localized  
235 FGFs. Importantly though, the transcriptional targets of these signalling pathways remain  
236 largely unknown.

237

### 238 **Specification and differentiation of the LPM**

239 Differentiation of the mesoderm into mature organ and tissue types involves hierarchies of  
240 transcriptional regulation (Prummel et al., 2020). However, the early genetic regulators which  
241 orchestrate cell fate choices during early mesoderm and LPM differentiation are less clear.  
242 We next examined lineage specification and transcriptional dynamics within the LPM by sub-  
243 setting the dataset to cells of mesodermal origin. Mesodermal cells were reprocessed with

244 UMAP dimension reduction and Leiden clustering, allocating the 6 previous clusters (c1, c3,  
245 c4, c5, c10 and c12; Figure 1a) into 12 new mesoderm sub-clusters (mc1-12; Figure 3a).  
246 These captured the previously determined cell types, as well additional intermediate,  
247 transitional, and terminal cell types which were altered during progression of developmental  
248 stage (Figure 3b). Namely, these updated clusters labelled cells from the somitic (mc9) and  
249 intermediate mesoderm (mc10), primitive mesoderm (mc2), early (undifferentiated) LPM  
250 (mc1 and mc7), somatic (mc3) and splanchnic (mc4) LPM, mesodermal visceral precursors  
251 (mc11), limb bud mesenchyme (mc5), non-limb flank LPM (mc12), extra-embryonic LPM  
252 (mc8) and amnion (mc6; Figure 3a). Diagnostic cluster gene markers and log-fold changes  
253 are listed in Table S2.

254 To improve identification of tissue differentiation pathways throughout the LPM,  
255 transcriptional dynamics between neighbouring cells of the mesoderm were explored using  
256 estimates of RNA velocity. Cell velocity estimates revealed specific, directional  
257 transcriptional trajectories between cells as they transitioned from undifferentiated E1.5  
258 (~HH10) precursors towards their distinct tissue fates, connecting three of the four E3.5  
259 (~HH18) cell populations (Figure 3b, c). Interestingly, we identified a heterogeneous  
260 population of undifferentiated LPM cells with low directional velocity compared with other  
261 neighbouring clusters, despite existing in various stages of the cell cycle (Figure 3c). This  
262 suggests that cells of the early LPM may exist in a transiently uncommitted state, before  
263 rapidly committing towards a somatic and splanchnic LPM fate by E2.5 (~HH14), likely in  
264 response to changes in secreted ectodermal/endodermal signals (Figure 2d). Furthermore, the  
265 somitic and intermediate cell clusters of the paraxial mesoderm, despite forming from the  
266 primitive mesoderm, did not show a continuum of directional RNA velocities from these  
267 precursors. As we did not intentionally sample paraxial tissues, it is unclear whether there  
268 were not enough cells isolated to represent the complete differentiation trajectory, or whether  
269 these cells possess an earlier embryonic origin to the primitive mesoderm cells captured in  
270 our data. As such, we chose to not include this lineage in subsequent analyses.

271 With transcriptional velocities established, we looked to further define the pathways of  
272 differentiation that arise throughout the LPM. The E1.5 primitive mesoderm (mc2)  
273 represented the earliest identified cell type so was determined as the root node of mesoderm  
274 differentiation. A principal neighbour graph was fit with monocle3 (Trapnell et al., 2014),  
275 revealing 4 major lineages (L1-4; Figure 3d) which supported RNA velocity estimates  
276 (Figure 3c). These lineages describe the transition from E1.5 (~HH10) primitive mesoderm

277 cells to E3.5 (~HH18) viscera precursors (mc11; L1), non-limb LPM (mc6 and mc12; L2),  
278 limb bud mesenchyme (mc5; L3) and somitic/intermediate mesoderm (mc9-10; L4).  
279 Importantly, a distinct bifurcation point was observed within the undifferentiated LPM  
280 (mc1/mc7), marking LPM subdivision and lineage specification into the somatic (mc3) and  
281 splanchnic (mc4) LPM tissue layers (Figure 3d). Subdivision of the undifferentiated LPM is  
282 accompanied by localized expression of *IRX3* and *FOXF1* in the somatic and splanchnic  
283 LPM, respectively (Funayama et al., 1999; Mahlapuu et al., 2001). To confirm the accuracy  
284 of our lineage bifurcation point we examined the expression of *IRX3* and *FOXF1* in the  
285 mesoderm. Indeed, cells displayed mutually exclusive expression of *IRX3* or *FOXF1* in  
286 complementary domains following the LPM bifurcation point (Figure 3d), with *FOXF1*+  
287 cells observed in the splanchnic mesoderm and viscera precursors (mc4/7/11), and *IRX3*+  
288 cells in the somatopleure, flank LPM and limb bud mesenchyme (mc1/3/5) (Figure 3d),  
289 confirming specification of the somatic and splanchnic LPM lineages. However, also  
290 included within this lineage graph was an irregular branch linking the splanchnic LPM to the  
291 extraembryonic LPM and amnion (Figure 3d, e, dashed line), which does not accurately  
292 represent its origins *in vivo*. We were able to resolve this branch through additional k-mean  
293 principal graph topology calculations, however these each came at the expense of the  
294 somatic-splanchnic LPM bifurcation point, with neither correct topology being present in a  
295 single graph without losing cluster resolution (Figure S1). As such, we focused solely on the  
296 somatic-splanchnic LPM branching, as confirmed by *FOXF1* and *IRX3* expression, for  
297 subsequent lineage trajectory analysis.

298

### 299 **Gene expression dynamics underlying aLPM specification and limb development**

300 Using our reconstructed LPM differentiation lineages, we examined key gene expression  
301 dynamics underlying subdivision of the somatic and splanchnic LPM and specification  
302 towards a limb or viscera fate. This was achieved through calculations of pseudotime along  
303 the viscera and limb lineages (Figure 3e) (Trapnell et al., 2014), where genes with significant  
304 expression changes along each branch were identified through Moran's I spatial  
305 autocorrelation (Table S3,S4). The top differentially regulated genes along a given lineage  
306 were visualized through expression heatmaps, which grouped these into gene co-activation or  
307 repression modules across pseudotime. This revealed a pseudo-temporal hierarchy of  
308 dynamically expressed genes during differentiation from the early mesoderm towards a

309 visceral (splanchnic LPM; Figure 3f, Figure S2) or limb (somatic LPM; Figure 3g, Figure S3)  
310 fate. Each lineage shared co-expression of primitive mesoderm and early LPM gene modules  
311 preceding subdivision, followed by activation of shared or lineage-specific genes and gene  
312 modules (Figure 3f, g). During splanchnic LPM differentiation and mesodermal viscera  
313 development, ~9 modules of genes were co-activated, including proximal activation of  
314 transcription factors *GATA6*, *NKX2-3*, *TCF21* and *HAND1*, and repression of *PRRX1* (Figure  
315 3f, Figure S3). Somatic LPM differentiation featured co-activation of ~6 transcriptionally  
316 distinct modules, including maintained *PRRX1*, proximal activation of *OLFML3*, *NR2F2* and  
317 retinoic acid synthesis *ALDH1A2* (Raldh2), followed by transcription factors *IRX3*, *IRX6* and  
318 bHLH factor *TWIST1* (Figure 3g, Figure S3). Proceeding this was the onset of limb initiation  
319 characterised by activation of the limb initiation factor *TBX5*, as well as *TBX2* and *IRX6*,  
320 followed by a module of early limb bud mesenchyme genes *LMX1B*, *PRRX2*, *WIF1* and  
321 *FGF10*. Interestingly, this analysis revealed rapid activation of *TWIST1* prior to limb  
322 initiation, suggesting an uncharacterized role during somatic LPM differentiation and early  
323 limb initiation.

324

### 325 **TWIST1 in somatic LPM initiation and EMT**

326 Limb initiation has been proposed to occur through a localized EMT of the somatic LPM,  
327 dependent on *TBX5* and *FGF10* (Gros and Tabin, 2014). However, prior to the activation of  
328 *TBX5* and *FGF10* in the somatic LPM, we observe activation of *PRRX1* and *TWIST1* (Figure  
329 3g) which are known EMT inducers during development and cancer (Ocaña et al., 2012;  
330 Fazilaty et al., 2019). We therefore investigated whether these transcription factors may play  
331 a role during EMT and initiation of the chicken forelimb. Combined pseudotime gene  
332 expression and *in situ* hybridization confirmed *PRRX1* was present in the aLPM forelimb  
333 field as early as E1.5/HH10, before becoming regionalized and strongly expressed in the  
334 somatic LPM and limb bud (Figure 4a). In comparison, *TWIST1* was detected in the somatic  
335 LPM at ~E2.0/HH12-13, but before *TBX5* which was activated shortly after at ~E2.5/HH14  
336 (Figure 4a).

337 The molecular role of *TWIST1* was further examined in the somatic LPM through  
338 immunofluorescence. Protein localization in the HH12 forelimb field revealed that the  
339 somatic LPM displayed meso-epithelial characteristics expressing N-cadherin, but not E-  
340 cadherin (which was restricted to the ectoderm and endoderm) (Figure 4b). Strong *TWIST1*

341 expression was detected specifically in the somatic LPM and somites, with some TWIST1+  
342 cells appearing to delaminate from the somatic LPM. By E2.5/HH14 the somatic LPM had  
343 undergone proliferation, observed by increased numbers of TWIST1+ cells with reduced N-  
344 cadherin, which became localized to the apical edge of the somatic LPM. By ~E3.0/HH16,  
345 the forelimb bud was distinct, populated by increased numbers of proliferative TWIST1+  
346 cells (Figure 4b). We also examined whether other EMT transcription factors are expressed  
347 during somatic LPM differentiation, but did not detect enrichment of other marker genes,  
348 compared to *TWIST1*, in somatic LPM or limb bud mesenchyme clusters (Figure 4c), or  
349 along the trajectory (Figure 3c, Figure S3). Rather, the early co-expression of *PRRX1* and  
350 *TWIST1* in somatic LPM (Figure 4a, b) suggests that they may play a co-operative role in  
351 somatic LPM EMT prior to *TBX5*-induced limb initiation and outgrowth.

352

### 353 **BMP signalling inhibition disrupts LPM differentiation and limb development**

354 With early markers of somatic LPM defined, we examined how the previously determined  
355 signalling interactions influence the expression of early LPM markers. Especially, we looked  
356 to define the role of ectodermal BMP signalling during LPM formation, subdivision, and  
357 limb bud differentiation, which have been implicated in early somatic LPM cell fate  
358 (Funayama et al., 1999). First, we examined whether inhibition of ectodermal-derived BMPs  
359 could perturb LPM subdivision and limb initiation. Surgical removal of the forelimb field  
360 ectoderm was sufficient to both decrease the developing somatic LPM and reduce *PRRX1*  
361 expression (Figure S4a) but was disruptive to development of the embryo and resulted in low  
362 viability. Alternatively, we performed targeted electroporation of the secreted BMP  
363 antagonist *NOGGIN* into the ~HH9 forelimb field ectoderm to inhibit BMP signalling  
364 between the ectoderm and LPM. BMP signal inhibition was not sufficient to disrupt LPM  
365 subdivision, despite being previously suggested to drive the process (Funayama et al., 1999).  
366 In the absence of BMP signals, the somatic and splanchnic LPM still formed and *PRRX1* and  
367 *FOXF1* expression was detected in their respective LPM layers (Figure 5a, Figure S4a).  
368 However, inhibition of BMP signalling greatly decreased the overall proportion of somatic  
369 LPM cells which formed and had accompanied reduction of *PRRX1* expression compared to  
370 the un-electroporated side and GFP controls (Figure 5b). Strikingly, this also significantly  
371 inhibited initiation and outgrowth of the developing forelimb bud, seen by significant  
372 reductions in *TBX5* and *FGF10* in the somatic LPM and early limb bud (Figure 5a, Figure

373 S4b). Interestingly though, while ectodermal BMP inhibition reduced proportions of somatic  
374 LPM cells, it did not appear to influence expression of RA-synthesis gene *ALDH1A2* (Figure  
375 S4b) or *TWIST1*, which showed similar expression and protein localization in forelimb  
376 sections, albeit in a reduced population of somatic LPM cells compared with controls (Figure  
377 5a, b). Together, these data clarify that ectodermal-mesodermal BMP signalling crosstalk is  
378 not necessary for LPM subdivision, but is required for somatic LPM identity, proliferation  
379 and early limb initiation and outgrowth. This is achieved through BMP-induced activation of  
380 LPM markers including *PRRX1*, *TBX5* and *FGF10*, but not *ALDH1A2* or *TWIST1* which are  
381 some of the first genes activated in the somatic LPM. Thus, while BMP signalling is  
382 necessary for somatic LPM development, it appears to be dependent on multiple signalling  
383 inputs.

384

## 385 Discussion

386 The lateral plate mesoderm gives rise to a wide range of mature tissue types, yet the early  
387 developmental events underlying its diversification remain largely undefined. Here, we apply  
388 single-cell transcriptomics to investigate cell lineage specification of the early aLPM to  
389 define differentiation pathways which direct subdivision of the LPM and specification  
390 towards a limb or viscera cell fate. Mesodermal specification originated in a primitive  
391 precursor cell type and followed four distinct differentiation pathways from E1.5 (~HH10) to  
392 E3.5 (~HH18). Initially, early E1.5 LPM progenitor cells displayed a large degree of cellular  
393 heterogeneity (Figure 3a-c) accompanied by extensive signalling pathway usage (Figure 2).  
394 This heterogeneity however was rapidly resolved by E2.5, where cells showed commitment  
395 to defined differentiation lineages accompanied by dynamic changes in signalling pathway  
396 activation and repression. Namely, specification of LPM was achieved through novel ligand-  
397 receptor interactions within known BMP, WNT and FGF signalling pathways during somatic  
398 LPM and limb formation, and HH signalling in splanchnic LPM development (Roberts et al.,  
399 1995; Funayama et al., 1999; Loh et al., 2016), which were distinct by E3.5 (Figure 2). Taken  
400 together, the incipient aLPM appears to form in a transient stem-like state, where cells are  
401 transcriptionally primed to respond to rapid changes in the extrinsic signalling environment to  
402 initiate LPM lineage specification.

403 LPM subdivision and somatic LPM development are not well defined (Prummel et al., 2019,  
404 2020), but have been suggested to occur through intrinsic activation of *PRRX1* and *IRX3*, and

405 repression of *FOXF1*, in response to ectodermal BMP signalling (Funayama et al., 1999;  
406 Mahlapuu et al., 2001; Ocaña et al., 2012). Using pseudotime trajectory analyses, we have  
407 defined the temporal activation and repression of gene modules which complement LPM  
408 subdivision and differentiation of the somatic and splanchnic LPM lineages (Figure 3f-g,  
409 Figure S2,3). We observe activation of several groups of transcription factors which may play  
410 critical roles in LPM cell fate. Of note, the earliest stages of LPM subdivision saw repression  
411 of primitive mesodermal gene modules and lineage-specific activation of the basic helix-  
412 loop-helix (bHLH) transcription factors *HAND1* and *TWIST1* within the splanchnic and  
413 somatic LPM lineages, respectively. *HAND1* and *TWIST1* possess known roles in gut and  
414 limb development (Firulli et al., 1998; Wu and Howard, 2002; Krawchuk et al., 2010; Loebel  
415 et al., 2012), but are yet to be examined during LPM subdivision. Interestingly, bHLH  
416 transcription factors form combinations of homo- and heterodimers with unique binding  
417 partners to dynamically regulate different biological processes (Fan et al., 2020). We observe  
418 expression of both ubiquitous and lineage-specific bHLH binding partners (e.g. *HAND2* and  
419 *PRRX1*, respectively) (Fan et al., 2020) throughout the mesodermal cell types. Thus lineage-  
420 specific activation of *TWIST1* and *HAND1* may mediate complementary, yet distinct roles in  
421 target gene activation during LPM subdivision and differentiation.

422 The first gene module activated during somatic LPM differentiation included the RA  
423 synthesis gene *ALDH1A2* and RA-responsive transcription factor *NR2F2* (Figure 3, S3),  
424 suggesting an immediate RA response not captured in our global signalling analysis.  
425 Proceeding this was activation of a module including *IRX3* and *TWIST1*, revealing these as  
426 the first transcription factors activated along the limb lineage. While *IRX3* is known to be  
427 active in the early somatic LPM (Funayama et al., 1999), its role in limb development is not  
428 well understood, and deletion of *Irx3* does not produce an overt phenotype in mouse.  
429 However, *Irx3/Irx5* double knockout mice have severe limb and heart dysmorphia,  
430 suggesting functional co-requirement or redundancy. *TWIST1* has known expression in the  
431 somatic LPM (Gitelman, 1997; Tavares et al., 2001), and important roles in limb patterning  
432 (Krawchuk et al., 2010; Loebel et al., 2012) though an early role during early limb initiation  
433 has not been reported. Limb initiation is posited to begin with EMT of the somatic LPM,  
434 dependant on *TBX5* and *FGF10* (Gros and Tabin, 2014). However, *TWIST1* is an important  
435 regulator of EMT in development and cancer (Fazilaty et al., 2019) suggesting it may possess  
436 an uncharacterized role during early EMT or proliferation of the forelimb field mesenchyme.  
437 In support of this idea, specific expression of *TWIST1*<sup>+</sup> cells in the somatic LPM of HH12

438 chicken embryos was detected before and after EMT and proliferation of the limb bud  
439 mesenchyme (Figure 4). *TWIST1* elicits different biological functions and activity thresholds  
440 through dimerization with other transcription factors (Krawchuk et al., 2010; Loebel et al.,  
441 2014; Fan et al., 2020), which notably includes the early LPM marker *PRRX1* (Fan et al.,  
442 2021). Indeed, this role is supported by observations that *prrx1a* and *twist1b* cooperatively  
443 drive EMT and migration of the LPM in zebrafish, which can be rescued by *twist1b*  
444 knockdown (Ocaña et al., 2012). Furthermore, *Twist1* null mutant mice possess severely  
445 atrophied forelimb buds, potentially through reduced EMT of LPM precursors (Chen and  
446 Behringer, 1995). Together, these data strongly implicate *TWIST1* as an early mediator of  
447 somatic LPM specification and EMT, though its role in limb initiation is unclear.  
448 Intriguingly, an interaction between *TWIST1* and *TBX5* may exist to influence limb initiation  
449 but requires further validation.

450 Our analyses of global ligand-receptor signalling confirmed ectodermal BMP signalling, via  
451 BMP2 and BMP7 ligands, as the major active signalling pathway with LPM (Figure 2),  
452 supporting its proposed importance in establishing somatic LPM identity (Funayama et al.,  
453 1999). To link whether these extrinsic signals were necessary for subdivision of the LPM and  
454 activation of intrinsic somatic LPM genes, such as *PRRX1*, *TWIST1* and *TBX5*, we utilized  
455 targeted inhibition of ectodermal-mesodermal BMP signalling via antagonism by *NOGGIN*.  
456 Antagonism of BMP signalling was sufficient to downregulate *PRRX1* in the LPM, but was  
457 not necessary for LPM subdivision (Figure 5, S4) as previously suggested (Funayama et al.,  
458 1999). However, BMP antagonism produced additional inhibitory effects on limb  
459 development through severe atrophy of limb bud outgrowth through a reduced the proportion  
460 of somatic LPM cells and complementary reduction of *TBX5* and *FGF10*. Previous studies  
461 have revealed that *TBX5* activation is achieved through multiple signal inputs, namely *HOX*  
462 expression, RA and  $\beta$ -*Catenin/TCF/LEF* through the canonical WNT signalling (Nishimoto  
463 et al., 2015). However, while our data shows no evidence for active WNT signalling in the  
464 somatic LPM (Figure 2), it establishes a novel role of BMP signalling in *TBX5/FGF10*  
465 activation. Notably, inhibition of BMP signalling prior to its critical window of activity  
466 between the ectoderm and early LPM is sufficient to inhibit forelimb outgrowth through  
467 reduced commitment of somatic LPM precursors. This is in contrast to previous studies  
468 utilizing retroviral delivery of *NOGGIN* to somatic LPM, which produce smaller limbs with  
469 patterning defects through aberrant formation of the AER (Capdevila and Johnson, 1998;  
470 Pizette and Niswander, 1999). Additionally, BMP signalling was not sufficient to influence



471 *TWIST1* in the somatic LPM but instead may be RA responsive. RA pathway genes  
472 *ALDH1A2* and *NR2F2* were activated in the LPM immediately prior to *TWIST1* activation  
473 (Figure 3, S3), and *TWIST1* can be induced during limb bud outgrowth through ectopic  
474 addition of RA (Tavares et al., 2001). However, the influence of RA in *TWIST1* induction in  
475 the early somatic LPM has yet to be seen. Nevertheless, these data suggest a model where  
476 LPM subdivision and somatic LPM differentiation may be achieved through the combined  
477 action of BMP and RA signalling.

478 This study establishes the first transcriptional atlas of progenitor, transitional and maturing  
479 cell types throughout the early forelimb field and uncovers the global signalling pathways  
480 and key transcription factors that are activated within developing tissues. We have begun to  
481 shed light on the early cell fate decisions that initiate development of the vertebrate limb,  
482 though additional analyses will strengthen the essential factors underlying its development.  
483 Particularly, as our data only captures the earliest stages of limb initiation, integrative  
484 analysis with later stages of limb patterning (Feregrino et al., 2019; Feregrino and Tschopp,  
485 2021) provides an opportunity to reconstruct the full cellular and developmental events  
486 underlying forelimb initiation, patterning and development. Furthermore, while we shed light  
487 on the genetic hierarchy that is active during LPM specification, the gene regulatory networks  
488 accompanying these are unknown. Applied single cell ATAC-seq and single-cell gene  
489 regulatory network reconstruction (Aibar et al., 2017) would further allowing the  
490 construction of gene regulatory networks within the developing LPM. Our data highlight a  
491 previously unidentified role for *TWIST1* as an early mediator of somatic LPM development,  
492 though additional work is required to define its precise role. Together, the application of these  
493 additional analysis will yield greater clarification into the processes that drive development of  
494 mesodermal precursors into complex structures such as the vertebrate limb.

495 **Figure Legends**

496 **Figure 1. Identification of cell types in the avian forelimb field**

497 (A) Cells were isolated from chicken embryonic day (e) 1.5, e2.5 and e3.5 to sample all  
498 major tissues in the developing forelimb field. (B) tSNE visualisation separated cells based  
499 on stage, and (C) germ layer origin. (D) Unsupervised clustering revealed 13 distinct clusters  
500 covering all major cell types in the developing forelimb field. (E) Unique gene expression  
501 profiles were detected for each major cluster, (F) and were largely specific to each cell  
502 population.

503

504 **Figure 2. Cellular signalling and ligand-receptor crosstalk in the forelimb field**

505 (A) Predictions of active signalling pathways utilized by cell type clusters revealed diverse  
506 pathway usage and enriched signalling in the early mesoderm, LPM, ectoderm and limb bud.  
507 Major signalling pathways are highlighted by red arrows, emphasizing tissue-specific  
508 differences in pathway usage. (B) Identification of sender and receiver cell types utilizing  
509 major signalling pathways. TGF $\beta$  signalling was enriched between the splanchnic LPM and  
510 vasculature, WNT signalling between the limb and ectoderm, FGF in the early mesoderm,  
511 HH in the endoderm and BMPs in the LPM and ectoderm. (C) Identification of key ligand-  
512 receptor pairs facilitating tissue-specific signalling from major signalling pathways. This  
513 revealed broad, tissue-specific patterns of ligand and receptor heterodimer usage between cell  
514 types. For example, BMP7 was identified as the main ligand facilitating ectoderm-LPM  
515 signalling, while several WNTs were expressed between the ectoderm and limb bud. FGF10  
516 was confirmed to signal between the limb and ectoderm. (D) Diagrammatic summary of  
517 signalling pathways active between tissues in the developing limb field.

518

519 **Figure 3. Lineage reconstruction and gene expression dynamics underlying LPM**  
520 **differentiation.**

521 (A) Subsampling, UMAP projection and re-clustering of mesodermal cell types revealed 12  
522 distinct sub-clusters (sc1-12) with greater resolution of lineage choices and transitional cell  
523 types in the forelimb mesoderm, which clearly separated by stage (B). (C) Transcriptional  
524 trajectories were identified through estimates of RNA velocity, revealing distinct lineages of  
525 differentiation across different stages of the cell cycle (insert). (D) Trajectory inference was  
526 computed with Monocle3 further describing 4 lineages (L1, L2, L3, L4) of differentiation.  
527 The somatic-splanchnic LPM bifurcation (black arrow) was calibrated using expression of  
528 known markers *IRX3* and *FOXF1*, respectively. (E) The root node was set in the primitive  
529 MES (white circle), and pseudotime calculated to identify gene expression dynamics along  
530 the splanchnic and somatic LPM lineages (bold lines). Gene expression dynamics were  
531 calculated along the splanchnic (F) and somatic (G) LPM lineages, revealing activation and  
532 repression of distinct gene modules accompanying their differentiation pathways. Unique  
533 lineage-specific genes in shown in black while shared genes are in green.

534

535 **Figure 4. TWIST1 is a likely regulator of somatic LPM and limb bud EMT**

536 (A) Expression dynamics of *PRRX1*, *TWIST1* and *TBX5* during somatic LPM lineage  
537 specification during pseudotime, and their spatiotemporal *in situ* gene expression profile  
538 during early chicken development. *PRRX1* demarks formation and development of the LPM,  
539 *TWIST1* is activated in the somatic LPM immediately prior to the onset of *TBX5*. (B)  
540 Immunofluorescent labelling in the developing forelimb field revealed the LPM possesses  
541 mesothelial characteristics, shown by absence of E-Cadherin and presence of N-Cadherin.  
542 *TWIST1* is observed in the stage (HH) 12 somatic LPM after subdivision, but prior to EMT  
543 and proliferation of the limb bud mesenchyme by stage (HH) 16. Note, *TWIST1*<sup>+</sup> cells are  
544 observed migrating out of the somatic LPM cell layer (arrows). (C) *TWIST1* (and *PRRX1*)  
545 appears as the major candidate underlying somatic LPM EMT, due to lack of enrichment of  
546 other EMT transcription factors in the somatic LPM.

547

548 **Figure 5. Inhibition of ectodermal BMP signalling severely impacts limb bud**  
549 **development**

550 **(A)** Targeted electroporation of the e1.5 (~HH10) limb field ectoderm. Electroporation of  
551 GFP into the ectoderm has no effect on limb bud outgrowth, while BMP antagonism via  
552 NOGGIN-GFP greatly inhibits formation of the somatic LPM and possess a greatly reduced  
553 limb bud, observed by reduced number of TWIST1+ cells (white arrow). **(B)** Ectodermal-  
554 mesodermal BMP antagonism by NOGGIN-GFP decreases activation of *PRRX1* and *TBX5* in  
555 the somatic LPM and developing limb bud, as well as in limb bud tissue sections. Note,  
556 *TWIST1* does not appear to be as significantly affected by NOGGIN-GFP, as though  
557 expression appears reduced in treated limb buds, levels of mRNA expression in limb sections  
558 appear unchanged compared to the control side, similar to observations of protein localization  
559 (A).

560 **Methods**

561 *Egg incubation, tissue collection, single cell sampling*

562 Chicken eggs were collected at embryonic day (e) 1.5 (stage 10), E2.5 (HH14) or E3.5  
563 (HH18), while emu eggs were collected at E3.5 (HH10) e4.5 (HH14) and e5.5 (HH18).  
564 Embryos were dissected away from extra-embryonic membranes, rinsed in ice-cold DPBS  
565 then the LPM dissected. LPM tissues were digested with 0.05% Trypsin / EDTA and  
566 incubated at 37°C for 15 minutes, with mechanical dissociation every 5 minutes until no  
567 clumps were visible. Enzymatic activity was stopped with addition of 10% FCS. The  
568 dissociated cells were spun at 400g for 5 minutes, then resuspended in 1x EDTA / Propidium  
569 Iodide in DMEM (Gibco). Cells were filtered through a 70um Flowmi Cell Strainer  
570 (Scienceware), and viable cells were isolated through flow cytometry (Flowcore, Monash  
571 University).

572 Samples were submitted to Micromon Genomics (Monash University) for analysis using the  
573 10X Genomics Chromium Controller and Chromium Single Cell 30 Library & Gel Bead Kit  
574 V2, as per the manufacturer's instructions. Samples were subjected to 10 cycles of PCR for  
575 cDNA amplification and 16 cycles for library amplification. Completed libraries were pooled  
576 in an equimolar ratio along with 5% PhiX Control Library V3 (Illumina), denatured and  
577 diluted to 2.0pM as per the manufacturer's instructions. The prepared libraries were  
578 sequencing using an Illumina Next-Seq500 using Illumina 150c V2 chemistry and V2.5 flow  
579 cell, as per the manufacturer's instructions.

580

581 *Bioinformatics Pre-processing*

582 Reads were aligned to the chicken GRCg6a reference using CellRanger (v4.0.0, using option:  
583 `-force-cells 15000`). Due to the number of reads observed just downstream of annotated  
584 genes, the gene annotation (from ensembl release 100, gene biotypes: protein coding,  
585 lincRNA and antisense) was edited to include 1000bp downstream each gene. Single cell  
586 analysis was performed in R using packages scran (Lun et al., 2021), scater (Mccarthy et al.,  
587 2017) for QC and iSEE for interactive viewing (Lun et al., 2018) . Gene names were used for  
588 analysis and, where they mapped to multiple ensembl ids, the ensembl ID with the highest  
589 number of counts was kept. Cells with low total umi counts (<2000) were excluded. Cell

590 cycle was annotated with cyclone in the scran package (Lun et al., 2021) using the mouse  
591 reference from (Scialdone et al., 2015) mapped to its one-to-one chicken orthologs.

592 The top 1000 genes with the highest biological variance were identified with modelGeneVar  
593 function of scran (Lun et al., 2021), blocked on the sequencing sample, and excluded  
594 mitochondrial genes or genes on the Z or W chromosomes to minimise sex effects. PCA was  
595 calculated on these, and the first 15 PCs used to generate a global chicken tSNE layout.  
596 Clusters were defined with the walktrap method, on a SNN graph (k=10) (Lun et al., 2021),  
597 and cluster identities were determined from gene logFC changes and spatial expression  
598 profiles in the Gallus Expression *In Situ* Hybridization Analysis (GEISHA) database (Bell et  
599 al., 2004; Darnell et al., 2007).

600

## 601 **Bioinformatic analysis**

### 602 *Global signalling pathway usage and ligand-receptor crosstalk*

603 Global signalling patterns throughout the chicken forelimb field were examined using the R  
604 package CellChat (Jin et al., 2021), where signalling communication networks were  
605 constructed based on 1:1 gene orthology with a curated *Homo sapiens* database and default  
606 parameters. Visualizations of pathway and ligand receptor signalling were generated with  
607 CellChat and edited with Adobe Illustrator.

608

### 609 *Mesoderm analysis and lineage reconstruction*

610 Mesodermal cell clusters were subset from the full tSNE for additional, focused analyses.  
611 Briefly, mesodermal clusters were subset to a new object, PCA and UMAP dimension  
612 reduction was recalculated using the previously determined highly variable genes and  
613 corrected for cell cycle effects. Next, the object was imported into Monocle3 (Spielmann et  
614 al.; Trapnell et al., 2014) for clustering (k=4). Cluster labels were confirmed by identifying  
615 differentially expressed marker genes through regression analysis implemented in  
616 `monocle_fit_models` function, producing distinct 12 clusters covering all known cell types  
617 within the developing limb field mesoderm.

618 Estimations of RNA velocity were produced, where reads were aligned to the reference a  
619 second time with STAR solo (v2.7.5) to identify proportions of spliced and unspliced  
620 transcripts (Dobin et al., 2013). Velocity analysis with performed with velocity.R (La Manno  
621 et al., 2018), and directional transcriptional velocities between cells were visualized. Lineage  
622 trajectories throughout the mesoderm were additionally constructed in Monocle3 using  
623 reverse graph embedding (k=4, minimum branch length = 15, rann.k = 50), which produced 4  
624 major lineages that originated in E1.5 cells and terminated in E3.5 cells. Lineage bifurcation  
625 points were corroborated using know LPM marker gene expression through the *plot\_cells*  
626 function, then pseudotime was calculated by selecting the origin of the lineages using the  
627 *order\_cells* function. Then, to identify genes that dynamically changed in expression across  
628 pseudotime, key lineages throughout the mesoderm were subset using the  
629 *chose\_graph\_segments* function and graph tests were run to identify lineage-specific,  
630 differentially regulated genes and filtered based on Moran's I statistic and q value. Modules  
631 of genes that significantly changed across pseudotime were visualized by hierarchical  
632 clustering through the R package ComplexHeatmap. Gene expression in individual cells  
633 across pseudotime were further visualized using the *plot\_gene\_in\_pseudotime* function in  
634 Monocle3.

635

## 636 **Functional experimentation**

### 637 *Gene expression analysis by in situ hybridization and immunofluorescence*

638 Whole mount *in situ* hybridization for spatial mRNA expression was carried out as described  
639 previously (Smith et al., 2016) with minor modifications. Briefly, whole HH8-HH18 chicken  
640 embryos were fixed overnight in 4% paraformaldehyde, dehydrated in methanol, and  
641 rehydrated in PBTX (PBS + 0.1% Triton X-1000). Tissues were permeabilized in 10mg/mL  
642 proteinase K for up to 1 hour, depending upon size then re-fixed in glutaraldehyde/ 4% PFA.  
643 Tissues underwent pre-hybridization (50% formamide, 5 x SSC, 0.1% Triton X-100, 0.5%  
644 CHAPS, 5mM EDTA, 50mg/mL Heparin, 1mg/mL yeast RNA, 2% blocking powder)  
645 overnight at 65°C. Riboprobe templates were provided as gifts, generated from public  
646 sources, or designed and synthesised in house. Primer sequences and/or source are listed in  
647 Table S5. Where applicable, templates were amplified from limb and whole embryo cDNA  
648 using gene specific primers. Fragments were resolved by 1% agarose electrophoresis,  
649 excised, and purified using a Nucleospin PCR clean-up kit and subcloned into p-GEM T-easy

650 (Promega). Antisense RNA probes were synthesized using T3, T7 or SP6 RNA polymerases  
651 and the DIG-labelling kit (Roche, #11277073910) as per the manufacturer's instructions.  
652 Precipitated probes were added to pre-hybridized tissues (approx. 5mL/ tube) and  
653 hybridization was carried out overnight at 65°C. Tissues were then subjected to stringency  
654 washes, blocked in BSA, then treated overnight with anti-DIG antibody conjugated with  
655 alkaline phosphatase. Tissues were exposed to BCIP/NBT colour reaction at room  
656 temperature for up to 3 hours (340mg/mL NBT and 175 mg/mL BCIP in NTMT (100mM  
657 NaCl, 100mM Tris-HCl, pH9.5, 50mM MgCl<sub>2</sub>, 0.1% Tween-20).

658 Chicken embryos were fixed in 4% PFA/PBS for 15 minutes at room temperature then cryo-  
659 protected in 30% sucrose. Embryos were snap frozen in OCT and 10mm frozen sections were  
660 cut. Antigen retrieval was performed for detection of TWIST1, otherwise sections were left  
661 in PBS. For co-detection of TWIST1 and other markers in the LPM, antibody incubations  
662 were performed on successive tissue sections. Sections were blocked and permeabilised in  
663 1% Triton X-100, 2% BSA/PBS for 1-2hr at room temperature, then incubated with primary  
664 antibody in 0.5% Triton X-100, 1% BSA/PBS incubation overnight at 4°C.

665

#### 666 *Targeted electroporation*

667 Electroporation of chicken ectoderm was performed using custom parameters. Briefly, eggs  
668 were incubated for ~36 hours until stage HH8-HH10. Here, a solution containing TOL2  
669 Transposase and NOGGIN-GFP plasmids at final concentrations of 1ug/ul were mixed with  
670 0.1% fast green and injected between the vitelline membrane and embryo. Electroporation  
671 was performed by placing the positive electrode above the presumptive forelimb field on the  
672 right side of the embryo, and negative electrode under the embryo above the yolk, and  
673 delivered through 3x 10V, 60ms width, 50ms space pulses (Intracel TSS20 Ovodyne  
674 Electroporator). Eggs were sealed with tape and the embryos were incubated for a further 24  
675 – 48h. Embryos were then harvested and GFP imaged on a Fluorescence dissecting  
676 microscope. GFP positive embryos were then fixed in 4% PFA overnight at 4°C.

677

#### 678 **Acknowledgements**

679 We thank Micromon Genomics for assistance with sequencing design, Monash University  
680 Flowcore for flow cytometry, and Monash Histology platform for histological processing.



681 We additionally thank Alex Combes and Kieran Short for helpful suggestions for choice of  
682 bioinformatics methods, and constructive comments from all members of the Smith Lab. This  
683 work was supported by the Australian Research Council Discovery Project scheme  
684 (DP190100890 to Craig Smith).

685

686 **Author contributions**

687 A.H.N and C.A.S conceptualized and designed the study. A.H.N performed the experiments.  
688 A.T.M assisted with flow cytometry. S.M.W performed bioinformatic pre-processing. A.H.N  
689 and S.M.W performed computational analysis. A.H.N, A.T.M and C.A.S analysed and  
690 interpreted the data. All authors contributed to preparation of the manuscript.

691

692 **Declaration of interests**

693 The authors declare no competing interests.

694 **References**

- 695 Agarwal, P., Wylie, J.N., Galceran, J., Arkhitko, O., Li, C., Deng, C., Grosschedl, R., and  
696 Bruneau, B.G. 2003. Tbx5 is essential for forelimb bud initiation following patterning of the  
697 limb field in the mouse embryo. *Development* 130: 623–633.
- 698 Aibar, S., González-Blas, C.B., Moerman, T., Huynh-Thu, V.A., Imrichova, H., Hulselmans,  
699 G., Rambow, F., Marine, J.C., Geurts, P., Aerts, J., et al. 2017. SCENIC: Single-cell  
700 regulatory network inference and clustering. *Nat. Methods* 14: 1083–1086.
- 701 Bell, G.W., Yatskievych, T.A., and Antin, P.B. 2004. GEISHA, a whole-mount in situ  
702 hybridization gene expression screen in chicken embryos. *Dev. Dyn.* 229: 677–687.
- 703 Capdevila, J., and Johnson, R.L. 1998. Endogenous and ectopic expression of noggin  
704 suggests a conserved mechanism for regulation of BMP function during limb and somite  
705 patterning. *Dev. Biol.* 197: 205–217.
- 706 Chen, Z.F., and Behringer, R.R. 1995. Twist Is Required in Head Mesenchyme for Cranial  
707 Neural Tube Morphogenesis. *Genes Dev.* 9: 686–699.
- 708 Darnell, D.K., Kaur, S., Stanislaw, S., Davey, S., Konieczka, J.H., Yatskievych, T.A., and  
709 Antin, P.B. 2007. GEISHA: an in situ hybridization gene expression resource for the chicken  
710 embryo. *Cytogenet. Genome Res.* 117: 30–35.
- 711 Dobin, A., Davis, C.A., Schlesinger, F., Drenkow, J., Zaleski, C., Jha, S., Batut, P., Chaisson,  
712 M., and Gingeras, T.R. 2013. Sequence analysis. 29: 15–21.
- 713 Fan, X., Pragathi Masamsetti, V., Sun, J.Q.J., Engholm-Keller, K., Osteil, P., Studdert, J.,  
714 Graham, M.E., Fossat, N., and Tam, P.P.L. 2021. Twist1 and chromatin regulatory proteins  
715 interact to guide neural crest cell differentiation. *Elife* 10: 1–71.
- 716 Fan, X., Waardenberg, A.J., Demuth, M., Osteil, P., Sun, J.Q.J., Loebel, D.A.F., Graham, M.,  
717 Tam, P.P.L., and Fossat, N. 2020. TWIST1 Homodimers and Heterodimers Orchestrate  
718 Lineage-Specific Differentiation. *Mol. Cell. Biol.* 40: 1–20.
- 719 Fazilaty, H., Rago, L., Kass Youssef, K., Ocaña, O.H., Garcia-Asencio, F., Arcas, A.,  
720 Galceran, J., and Nieto, M.A. 2019. A gene regulatory network to control EMT programs in  
721 development and disease. *Nat. Commun.* 10:.
- 722 Feregrino, C., Sacher, F., Parnas, O., and Tschopp, P. 2019. A single-cell transcriptomic atlas

- 723 of the developing chicken limb. *BMC Genomics* 20: 1–15.
- 724 Feregrino, C., and Tschopp, P. 2021. Assessing evolutionary and developmental  
725 transcriptome dynamics in homologous cell types. *Dev. Dyn.* 1–18.
- 726 Firulli, A.B., McFadden, D.G., Lin, Q., Srivastava, D., and Olson, E.N. 1998. Heart and  
727 extra-embryonic mesodermal defects in mouse embryos lacking the bHLH transcription  
728 factor Hand1. *Nat. Genet.* 18: 266–270.
- 729 Funayama, N., Sato, Y., Matsumoto, K., Ogura, T., and Takahashi, Y. 1999. Coelom  
730 formation: Binary decision of the lateral plate mesoderm is controlled by the ectoderm.  
731 *Development* 126: 4129–4138.
- 732 Gerber, T., Murawala, P., Knapp, D., Masselink, W., Schuez, M., Hermann, S., Gac-Santel,  
733 M., Nowoshilow, S., Kageyama, J., Khattak, S., et al. 2018. Single-cell analysis uncovers  
734 convergence of cell identities during axolotl limb regeneration. *Science* (80-. ). 362:  
735 eaaq0681.
- 736 Gitelman, I. 1997. Twist protein in mouse embryogenesis. *Dev. Biol.* 189: 205–214.
- 737 Gros, J., and Tabin, C.J. 2014. Vertebrate Limb Bud Formation Is Initiated by Localized  
738 Epithelial-to-Mesenchymal Transition. *Science* (80-. ). 343: 1253–1256.
- 739 Hamburger, V., and Hamilton, H.L. 1951. A series of normal stages in the development of  
740 the chick embryo. *J. Morphol.* 88: 49–92.
- 741 Han, L., Chaturvedi, P., Kishimoto, K., Koike, H., Nasr, T., Iwasawa, K., Giesbrecht, K.,  
742 Witcher, P.C., Eicher, A., Haines, L., et al. 2020. Single cell transcriptomics identifies a  
743 signaling network coordinating endoderm and mesoderm diversification during foregut  
744 organogenesis. *Nat. Commun.* 11:.
- 745 Harvey, R.P., Lai, D., Elliott, D., Biben, C., Solloway, M., Prall, O., Stennard, F., Schindeler,  
746 A., Groves, N., Lavulo, L., et al. 2002. Homeodomain factor Nkx2-5 in heart development  
747 and disease. *Cold Spring Harb. Symp. Quant. Biol.* 67: 107–114.
- 748 Jin, S., Guerrero-Juarez, C.F., Zhang, L., Chang, I., Ramos, R., Kuan, C.H., Myung, P.,  
749 Plikus, M. V., and Nie, Q. 2021. Inference and analysis of cell-cell communication using  
750 CellChat. *Nat. Commun.* 12: 1–20.
- 751 Johnson, G.L., Masias, E.J., and Lehoczky, J.A. 2020. Cellular Heterogeneity and Lineage

- 752 Restriction during Mouse Digit Tip Regeneration at Single-Cell Resolution. *Dev. Cell* 52:  
753 525-540.e5.
- 754 Krawchuk, D., Weiner, S.J., Chen, Y.T., Lu, B.C., Costantini, F., Behringer, R.R., and  
755 Laufer, E. 2010. Twist1 activity thresholds define multiple functions in limb development.  
756 *Dev. Biol.* 347: 133–146.
- 757 Kuratani, S., Martin, J.F., Wawersik, S., Lilly, B., Eichele, G., and Olson, E.N. 1994. The  
758 expression pattern of the chick homeobox gene gMHox suggests a role in patterning of the  
759 limbs and face and in compartmentalization of somites. *Dev. Biol.* 161: 357–369.
- 760 Li, D., Sakuma, R., Vakili, N.A., Mo, R., Puviindran, V., Deimling, S., Zhang, X., Hopyan,  
761 S., and Hui, C. 2014. Formation of Proximal and Anterior Limb Skeleton Requires Early  
762 Function of *Irx3* and *Irx5* and Is Negatively Regulated by Shh Signaling. *Dev. Cell* 29: 233–  
763 240.
- 764 Loebel, D.A.F., Hor, A.C.C., Bildsoe, H., Jones, V., Chen, Y.T., Behringer, R.R., and Tam,  
765 P.P.L. 2012. Regionalized Twist1 activity in the forelimb bud drives the morphogenesis of  
766 the proximal and preaxial skeleton. *Dev. Biol.* 362: 132–140.
- 767 Loebel, D.A.F., Hor, A.C.C., Bildsoe, H.K., and Tam, P.P.L. 2014. Timed deletion of Twist1  
768 in the limb bud reveals age-specific impacts on autopod and zeugopod patterning. *PLoS One*  
769 9:.
- 770 Logan, M., Simon, H.G., and Tabin, C. 1998. Differential regulation of T-box and homeobox  
771 transcription factors suggests roles in controlling chick limb-type identity. *Development* 125:  
772 2825–2835.
- 773 Loh, K.M.M., Chen, A., Koh, P.W.W., Deng, T.Z.Z., Sinha, R., Tsai, J.M.M., Barkal,  
774 A.A.A., Shen, K.Y.Y., Jain, R., Morganti, R.M.M., et al. 2016. Mapping the Pairwise  
775 Choices Leading from Pluripotency to Human Bone, Heart, and Other Mesoderm Cell Types.  
776 *Cell* 166: 451–467.
- 777 Lun, A.T.L., McCarthy, D.J., and Marioni, J.C. 2021. A step-by-step workflow for low-level  
778 analysis of single-cell RNA-seq data with Bioconductor [ version 2.0.0; peer review: 3  
779 approved, 2 approved with reservations ].
- 780 Lun, A.T.L., Rue-Albrecht, K., Marini, F., and Soneson, C. 2018. iSEE: Interactive  
781 SummarizedExperiment Explorer [version 1; referees: 2 approved]. *F1000Research* 7:.

- 782 Mahadevaiah, S.K., Sangrithi, M.N., Hirota, T., and Turner, J.M.A. 2020. A single-cell  
783 transcriptome atlas of marsupial embryogenesis and X inactivation. *Nature* 586: 612–617.
- 784 Mahlapuu, M., Ormestad, M., Enerbäck, S., and Carlsson, P. 2001. The forkhead  
785 transcription factor Foxf1 is required for differentiation of extra-embryonic and lateral plate  
786 mesoderm. *Development* 128: 155–166.
- 787 La Manno, G., Soldatov, R., Zeisel, A., Braun, E., Hochgerner, H., Petukhov, V.,  
788 Lidschreiber, K., Kastrioti, M.E., Lönnerberg, P., Furlan, A., et al. 2018. RNA velocity of  
789 single cells. *Nature* 560: 494–498.
- 790 Martin, J.F., Bradley, A., Olson, E.N., and Eric, N.O. 1995. The paired-like homeo box gene  
791 MHox is required for early events of skeletogenesis in multiple lineages. *Genes Dev.* 9:  
792 1237–1249.
- 793 Mccarthy, D.J., Campbell, K.R., Lun, A.T.L., and Wills, Q.F. 2017. Gene expression  
794 Scater: pre-processing , quality control , normalization and visualization of single-cell  
795 RNA-seq data in R. 33: 1179–1186.
- 796 Moon, A.M., and Capecchi, M.R. 2000. Fgf8 is required for outgrowth and patterning of the  
797 limbs. *Nat. Genet.* 26: 455–459.
- 798 Newton, A.H., and Smith, C.A. 2020. Regulation of vertebrate forelimb development and  
799 wing reduction in the flightless emu. *Dev. Dyn.* dvyd.288.
- 800 Nishimoto, S., and Logan, M.P.O. 2016. Subdivision of the lateral plate mesoderm and  
801 specification of the forelimb and hindlimb forming domains. *Semin. Cell Dev. Biol.* 49: 102–  
802 108.
- 803 Nishimoto, S., Wilde, S.M., Wood, S., and Logan, M.P.O. 2015. RA Acts in a Coherent  
804 Feed-Forward Mechanism with Tbx5 to Control Limb Bud Induction and Initiation. *Cell Rep.*  
805 12: 879–891.
- 806 Ocaña, O.H., Córcoles, R., Fabra, Á., Moreno-Bueno, G., Acloque, H., Vega, S., Barrallo-  
807 Gimeno, A., Cano, A., Nieto, M.A., Co, R., et al. 2012. Metastatic Colonization Requires the  
808 Repression of the Epithelial-Mesenchymal Transition Inducer Prrx1. *Cancer Cell* 22: 709–  
809 724.
- 810 Ohuchi, H., Nakagawa, T., Yamamoto, A., Araga, A., Ohata, T., Ishimaru, Y., Yoshioka, H.,  
811 Kuwana, T., Nohno, T., Yamasaki, M., et al. 1997. The mesenchymal factor, FGF10, initiates

- 812 and maintains the outgrowth of the chick limb bud through interaction with FGF8, an apical  
813 ectodermal factor. *Development* 124: 2235–2244.
- 814 Peterson, R.S., Lim, L., Ye, H., Zhou, H., Overdier, D.G., and Costa, R.H. 1997. The winged  
815 helix transcriptional activator HFH-8 is expressed in the mesoderm of the primitive streak  
816 stage of mouse embryos and its cellular derivatives. *Mech. Dev.* 69: 53–69.
- 817 Pijuan-Sala, B., Griffiths, J.A., Guibentif, C., Hiscock, T.W., Jawaid, W., Calero-Nieto, F.J.,  
818 Mulas, C., Ibarra-Soria, X., Tyser, R.C.V., Ho, D.L.L., et al. 2019. A single-cell molecular  
819 map of mouse gastrulation and early organogenesis. *Nature* 566: 490–495.
- 820 Pizette, S., and Niswander, L. 1999. BMPs negatively regulate structure and function of the  
821 limb apical ectodermal ridge. *Development* 126: 883–894.
- 822 Prummel, K.D., Hess, C., Nieuwenhuize, S., Parker, H.J., Rogers, K.W., Kozmikova, I.,  
823 Racioppi, C., Brombacher, E.C., Czarkwiani, A., Knapp, D., et al. 2019. A conserved  
824 regulatory program initiates lateral plate mesoderm emergence across chordates. *Nat.*  
825 *Commun.* 10: 1–15.
- 826 Prummel, K.D., Nieuwenhuize, S., and Mosimann, C. 2020. The lateral plate mesoderm. *Dev.*  
827 147:.
- 828 Rallis, C., Bruneau, B.G., Del Buono, J., Seidman, C.E., Seidman, J.G., Nissim, S., Tabin,  
829 C.J., and Logan, M.P.O. 2003. Tbx5 is required for forelimb bud formation and continued  
830 outgrowth. *Development* 130: 2741–2751.
- 831 Roberts, D.J., Johnson, R.L., Burke, A.C., Nelson, C.E., Morgan, B.A., and Tabin, C. 1995.  
832 Sonic hedgehog is an endodermal signal inducing Bmp-4 and Hox genes during induction  
833 and regionalization of the chick hindgut. *Development* 121: 3163–3174.
- 834 Scialdone, A., Natarajan, K.N., Saraiva, L.R., Proserpio, V., Teichmann, S.A., Stegle, O.,  
835 Marioni, J.C., and Buettner, F. 2015. Computational assignment of cell-cycle stage from  
836 single-cell transcriptome data. *Methods* 85: 54–61.
- 837 Scialdone, A., Tanaka, Y., Jawaid, W., Moignard, V., Wilson, N.K., Macaulay, I.C., Marioni,  
838 J.C., and Göttgens, B. 2016. Resolving early mesoderm diversification through single-cell  
839 expression profiling. *Nature* 535: 289–293.
- 840 Smith, C.A., Farlie, P.G., Davidson, N.M., Roeszler, K.N., Hirst, C., Oshlack, A., and  
841 Lambert, D.M. 2016. Limb patterning genes and heterochronic development of the emu wing

- 842 bud. *Evodevo* 7: 1–17.
- 843 Spielmann, M., Qiu, X., Huang, X., Ibrahim, D.M., Hill, A.J., and Zhang, F. The single-cell  
844 transcriptional landscape of mammalian organogenesis. *Nature*.
- 845 Tanaka, M. 2016. Developmental Mechanism of Limb Field Specification along the  
846 Anterior–Posterior Axis during Vertebrate Evolution. *J. Dev. Biol.* 4: 18.
- 847 Tavares, A.T., Izpisúa-Belmonte, J.C., and Rodríguez-León, J. 2001. Developmental  
848 expression of chick Twist and its regulation during limb patterning. *Int. J. Dev. Biol.* 45: 707–  
849 713.
- 850 Tickle, C. 2015. How the embryo makes a limb: Determination, polarity and identity. *J. Anat.*  
851 227: 418–430.
- 852 Tonegawa, A., Funayama, N., Ueno, N., and Takahashi, Y. 1997. Mesodermal subdivision  
853 along the mediolateral axis in chicken controlled by different concentrations of BMP-4.  
854 *Development* 124: 1975–1984.
- 855 Tonegawa, A., and Takahashi, Y. 1998. Somitogenesis Controlled by Noggin. *Dev. Biol.* 202:  
856 172–182.
- 857 Trapnell, C., Cacchiarelli, D., Grimsby, J., Pokharel, P., Li, S., Morse, M., Lennon, N.J.,  
858 Livak, K.J., Mikkelsen, T.S., and Rinn, J.L. 2014. The dynamics and regulators of cell fate  
859 decisions are revealed by pseudotemporal ordering of single cells. *Nat. Biotechnol.* 32: 381–  
860 386.
- 861 Wang, Q., Lan, Y., Cho, E.-S., Maltby, K.M., and Jiang, R. 2005. Odd-skipped related 1  
862 (Odd1) is an essential regulator of heart and urogenital development. *Dev. Biol.* 288: 582–  
863 594.
- 864 Wu, X., and Howard, M.J. 2002. Transcripts encoding hand genes are differentially  
865 expressed and regulated by BMP4 and GDNF in developing avian gut. *Gene Expr.* 10: 279–  
866 293.
- 867 Yoshino, T., Murai, H., and Saito, D. 2016. Hedgehog-BMP signalling establishes  
868 dorsoventral patterning in lateral plate mesoderm to trigger gonadogenesis in chicken  
869 embryos. *Nat. Commun.* 7: 1–11.
- 870 Zuniga, A.A. 2015. Next generation limb development and evolution: Old questions, new

871 perspectives. *Dev.* 142: 3810–3820.

872

873



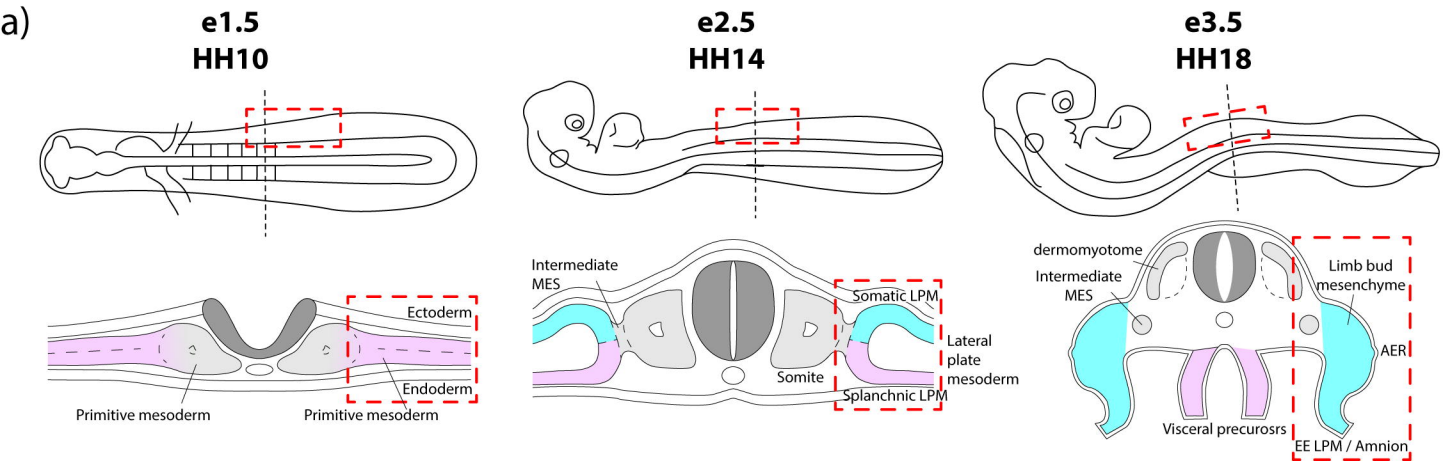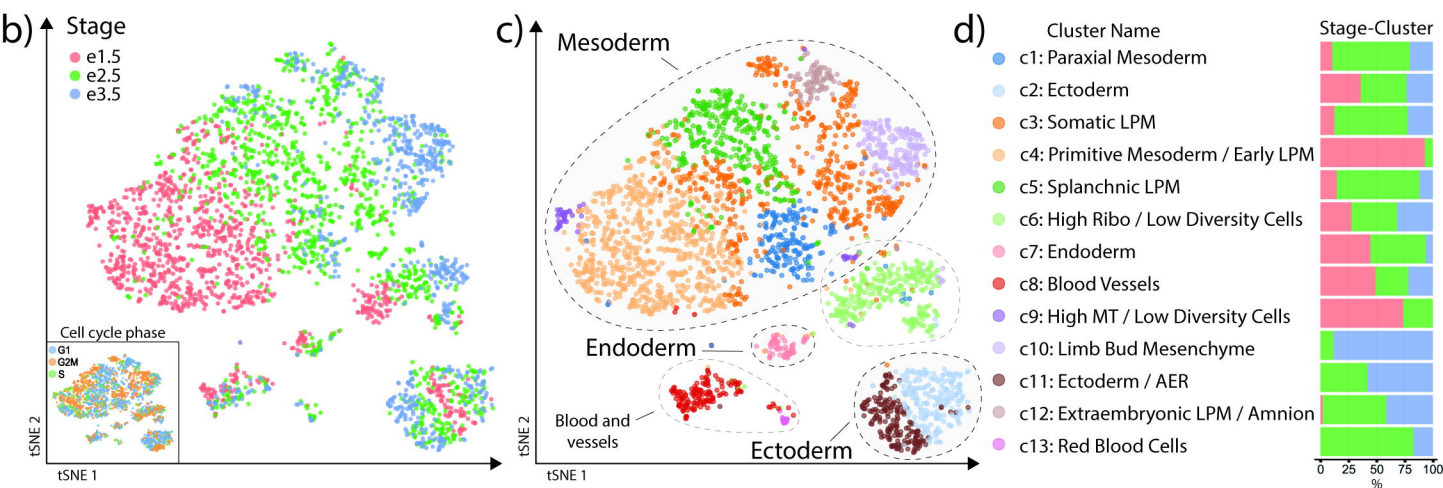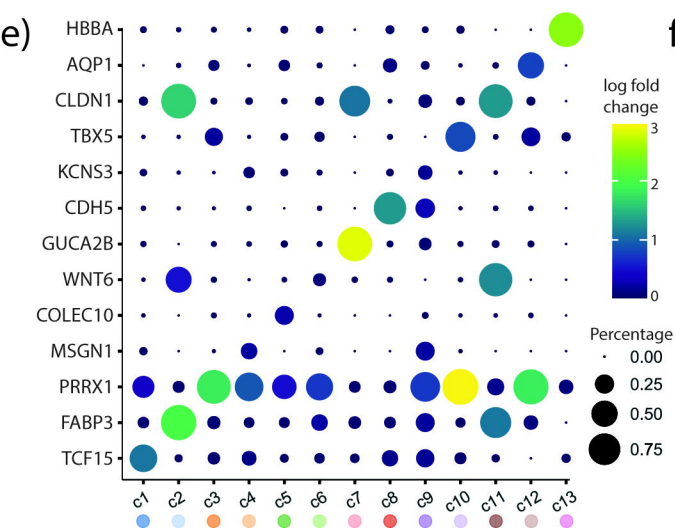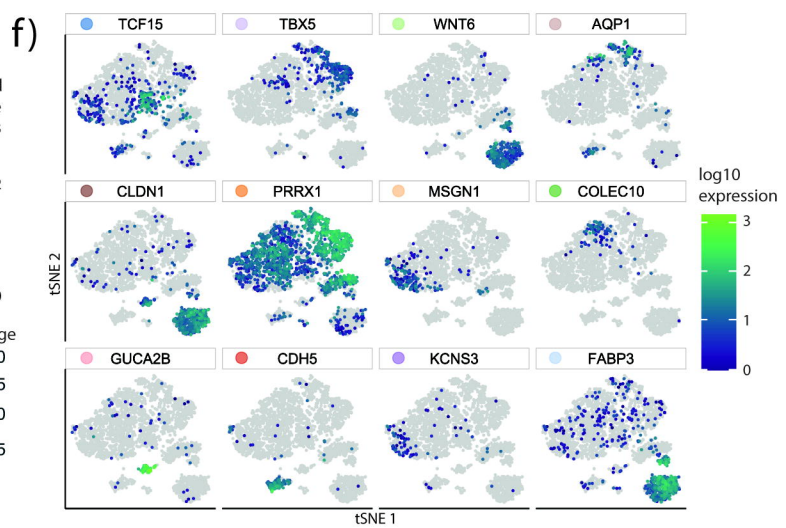

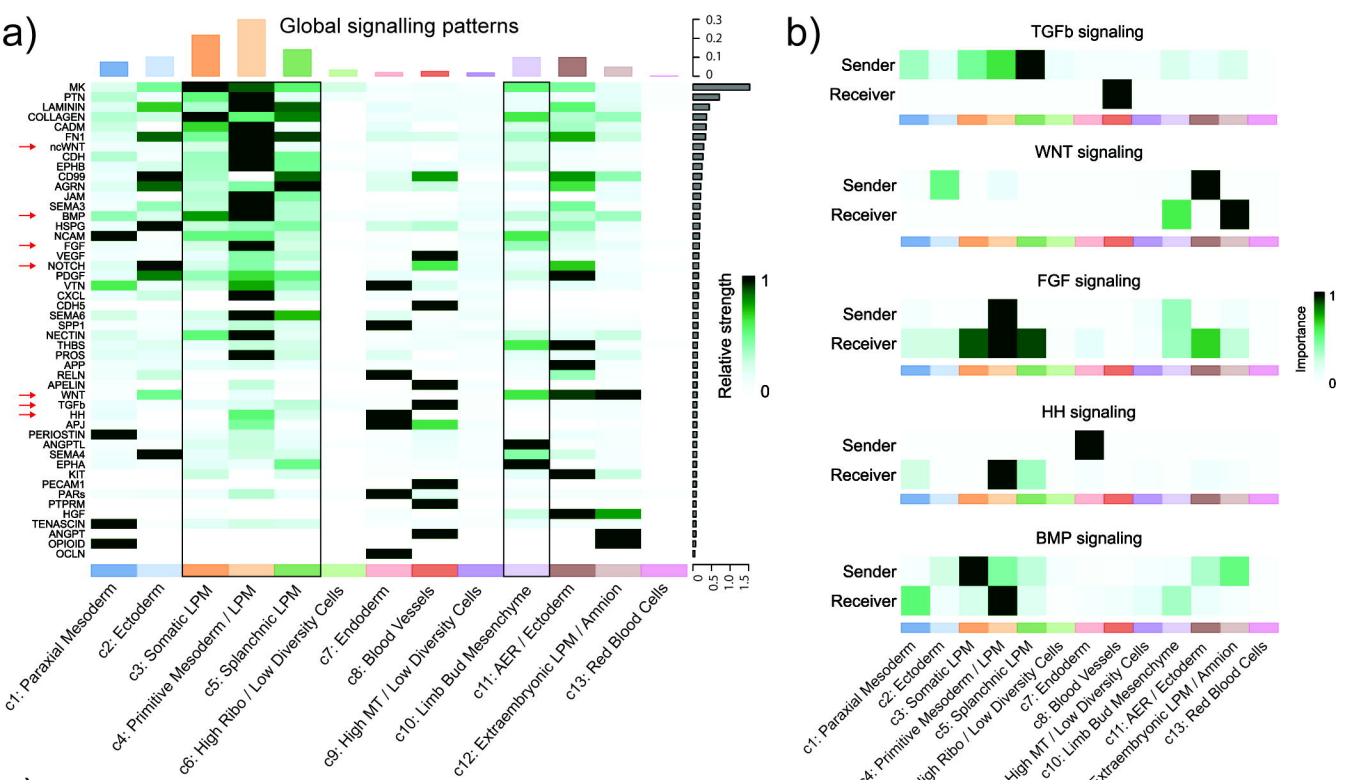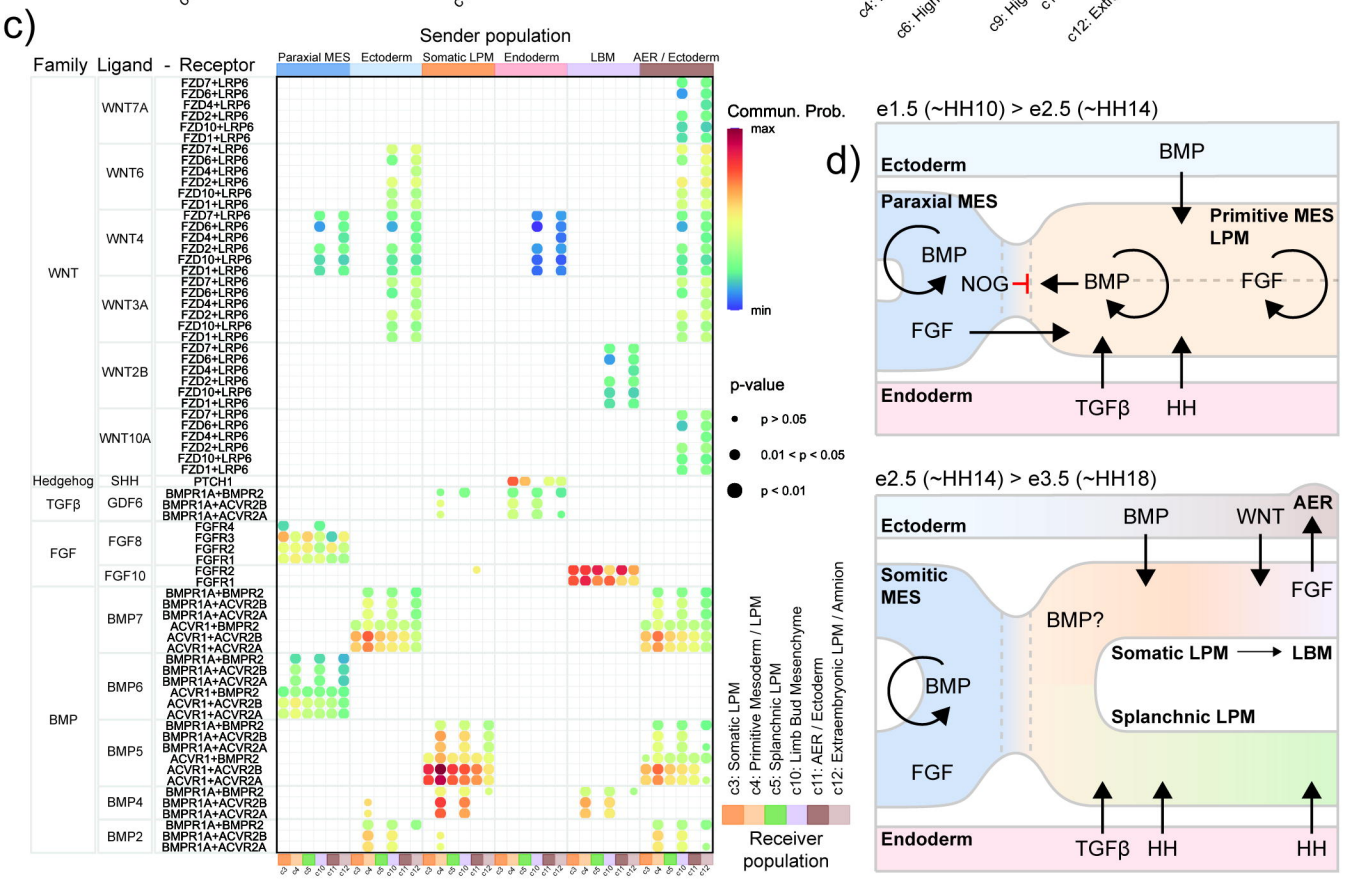

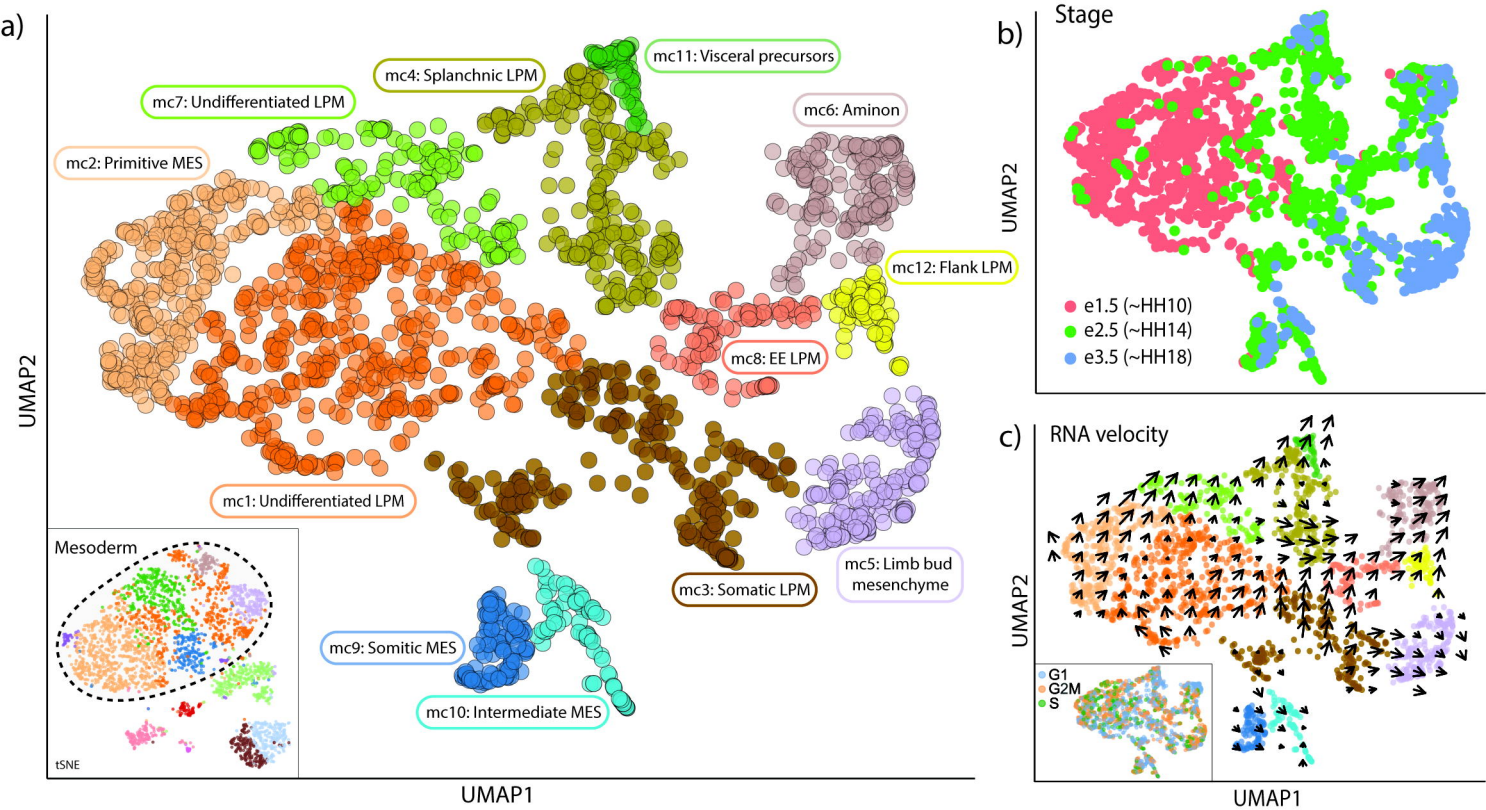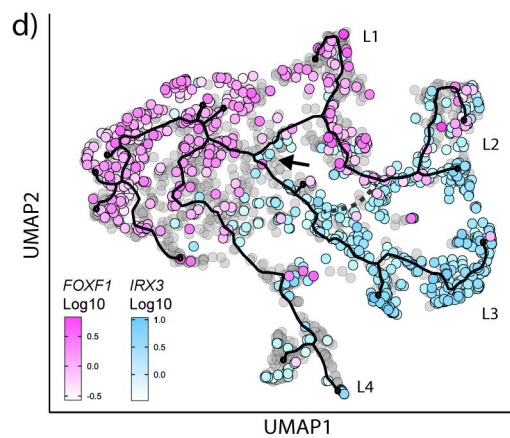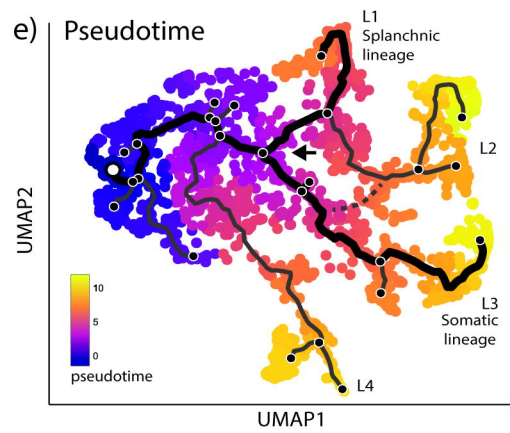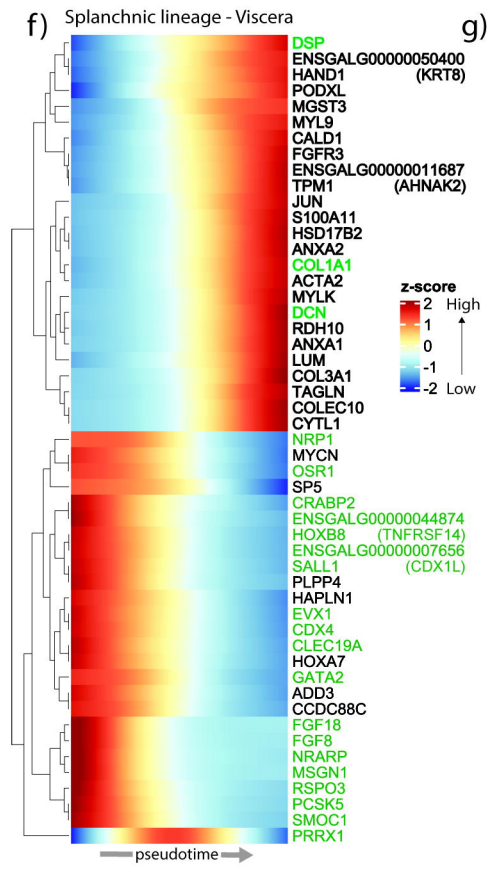

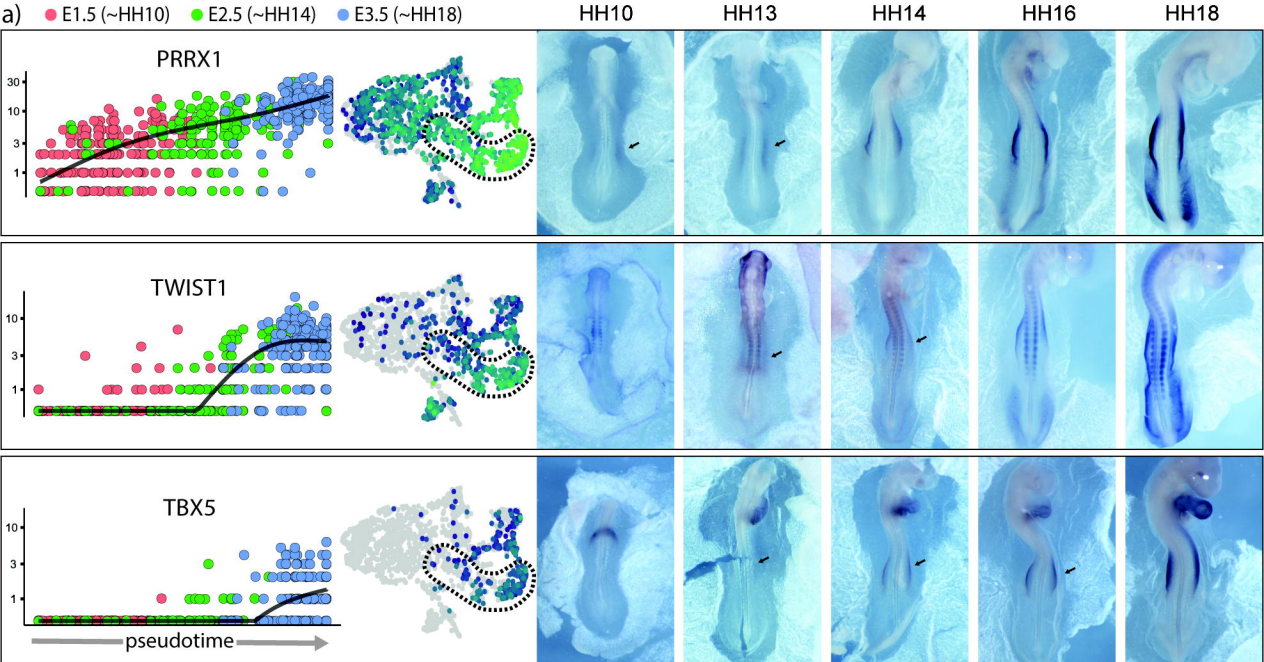

b)

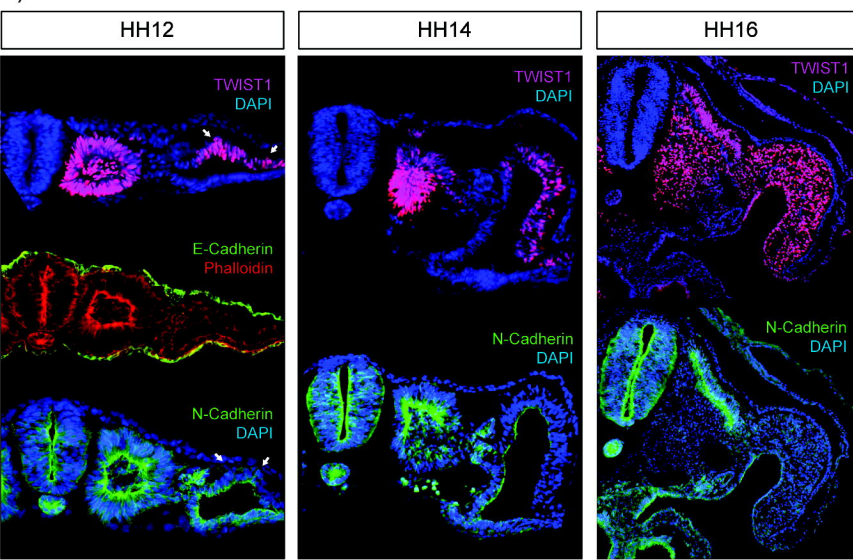

c)

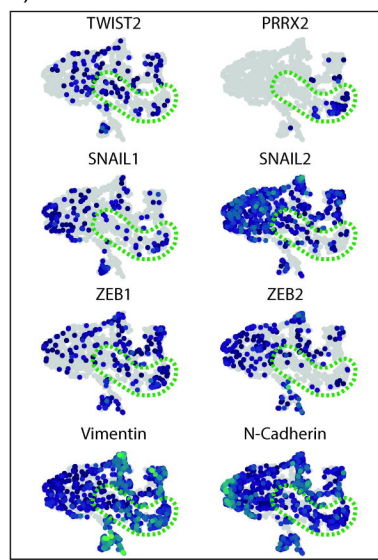

Figure 5

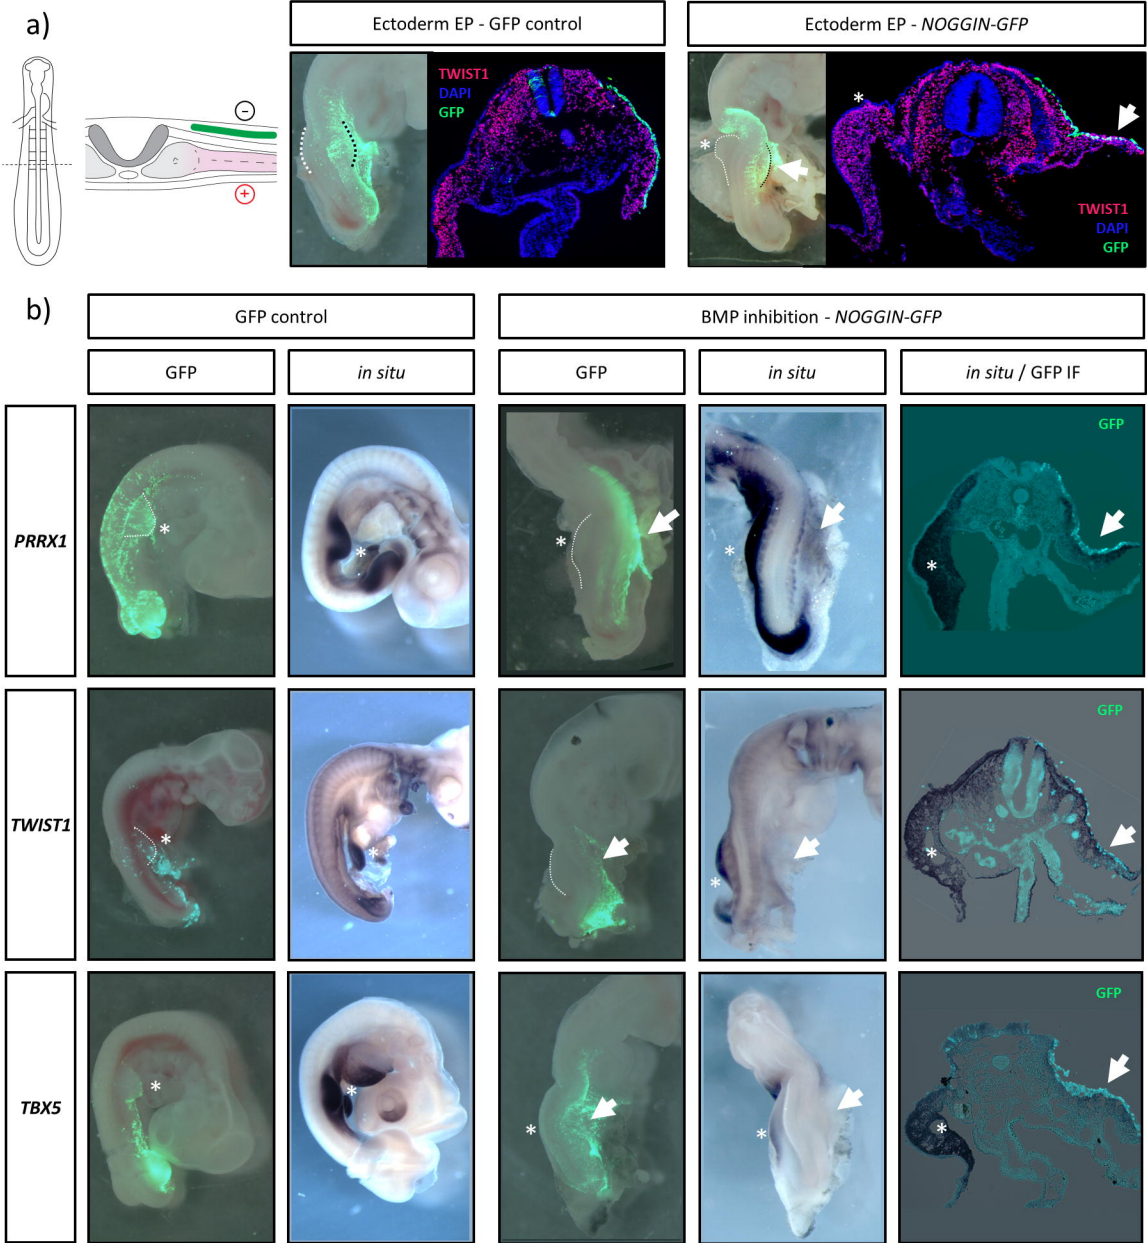

Source: https://www.biorxiv.org/content/10.1101/2022.01.13.475748v1.full.pdf
